# Supplementary material for: Development of Methods Derived from Iodine-Induced Specific Cleavage for Identification and Quantitation of DNA Phosphorothioate Modifications
Source: MDPI journal article supplement (doi:10.3390/biom10111491), 2020-10-28
Supplement: s1 [file s1]

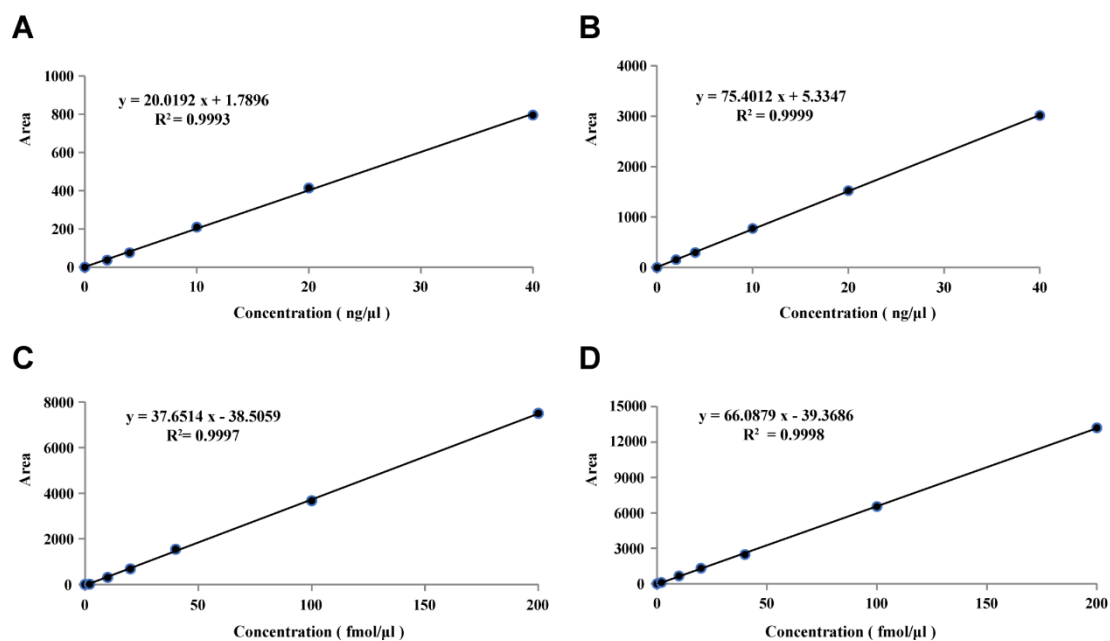

**Figure 1.** The establishment of standard curve. The standard curve of (A) T and (B) C, and standard curve of (C) GpsA and (D) GpsT.
