# Supplementary material for: Development of Methods Derived from Iodine-Induced Specific Cleavage for Identification and Quantitation of DNA Phosphorothioate Modifications
Source: Biomolecules. 2020 Oct 28;10(11):1491. doi: 10.3390/biom10111491 (PMC7692671; doi:10.3390/biom10111491)
Supplement: Supplementary file 1 [file biomolecules-10-01491-s001.zip › Table S1.xlsx]

## Sheet: Escherichia coli B7A
ICDS sequencing analysis of phosphorothioate modifications across the Escherichia coli B7A genome
Position	pattern	Depth of reads ended at this sites
301	GTTC	41
358	GTTC	560
453	GTTC	105
498	GTTC	39
614	GTTC	0
700	GAAC	20
803	GTTC	0
1013	GTTC	0
1138	GTTC	55
1181	GTTC	21
1207	GTTC	8
2032	GTTC	495
2047	GTTC	10
2336	GTTC	35
2347	GAAC	1622
2365	GTTC	108
2533	GAAC	14
2618	GTTC	30
2777	GTTC	26
3097	GAAC	39
3134	GTTC	891
3233	GTTC	33
3616	GTTC	84
3652	GTTC	197
3664	GAAC	484
3793	GTTC	204
3865	GAAC	177
4157	GAAC	252
4241	GAAC	76
4326	GTTC	492
4365	GTTC	109
4534	GTTC	152
4682	GTTC	184
4864	GAAC	168
4913	GTTC	42
5025	GTTC	88
5041	GTTC	27
5137	GTTC	706
5145	GTTC	352
5390	GTTC	92
5839	GTTC	101
5893	GTTC	42
5996	GTTC	176
6176	GTTC	58
6235	GAAC	39
6408	GTTC	31
6433	GTTC	6
6455	GTTC	215
6591	GAAC	1263
6623	GTTC	92
6653	GTTC	30
6667	GAAC	315
6671	GAAC	56
6767	GTTC	12
6971	GTTC	10
6986	GTTC	114
7285	GTTC	633
7432	GTTC	32
7490	GTTC	328
8102	GTTC	242
8228	GTTC	215
8423	GTTC	410
8651	GAAC	1104
9166	GTTC	1120
9494	GTTC	103
9557	GAAC	22
9834	GAAC	30
9864	GTTC	9
10369	GTTC	7
10421	GTTC	224
10466	GTTC	1072
10520	GAAC	23
10960	GTTC	46
11447	GTTC	9
11516	GTTC	116
11521	GTTC	311
11662	GTTC	31
11772	GTTC	20
11858	GTTC	257
11867	GTTC	60
13048	GTTC	805
13129	GAAC	822
13309	GAAC	66
13510	GTTC	24
13522	GTTC	66
13609	GTTC	290
13951	GTTC	259
14058	GTTC	3
14116	GTTC	39
14181	GTTC	646
14263	GTTC	64
14316	GTTC	58
14403	GTTC	568
14427	GTTC	34
14610	GTTC	15
14734	GTTC	37
14845	GTTC	241
15019	GTTC	402
15077	GTTC	191
15318	GTTC	92
15333	GTTC	682
15427	GAAC	159
15444	GTTC	15
16390	GTTC	193
16395	GAAC	206
16503	GTTC	316
16530	GAAC	160
16575	GAAC	22
16667	GTTC	527
17112	GTTC	180
17573	GTTC	57
17578	GTTC	41
17694	GTTC	13
17931	GTTC	182
18377	GAAC	1805
18756	GTTC	380
19248	GAAC	179
19351	GAAC	40
19366	GAAC	106
19443	GTTC	230
19468	GAAC	1124
19473	GTTC	44
19597	GTTC	446
19674	GTTC	66
19737	GAAC	35
19999	GAAC	21
20071	GAAC	71
20094	GAAC	25
20191	GTTC	204
20281	GAAC	176
20338	GAAC	33
20374	GAAC	69
20379	GAAC	61
20410	GAAC	54
20503	GTTC	26
20508	GAAC	27
20538	GTTC	18
20589	GAAC	14
20619	GAAC	89
20674	GAAC	1099
20808	GAAC	58
20841	GAAC	26
20884	GTTC	31
20991	GTTC	65
21037	GTTC	73
21099	GAAC	27
21122	GTTC	43
21148	GTTC	73
21689	GTTC	1129
21820	GTTC	236
22977	GTTC	55
23067	GAAC	333
23127	GAAC	102
23278	GAAC	43
23497	GTTC	1147
23560	GTTC	7
23619	GAAC	6
23709	GAAC	147
23776	GTTC	5
23816	GTTC	14
23958	GAAC	30
23982	GTTC	84
24159	GAAC	34
24238	GTTC	7
24265	GTTC	993
24645	GTTC	137
24702	GAAC	127
24798	GAAC	19
24872	GAAC	202
25089	GAAC	275
25607	GAAC	36
25657	GTTC	1465
25671	GTTC	226
25719	GAAC	55
26212	GAAC	610
26358	GTTC	324
26404	GTTC	197
26468	GAAC	146
26478	GTTC	41
26487	GAAC	382
26520	GAAC	16
26652	GAAC	27
26656	GTTC	62
26740	GAAC	5
26802	GAAC	200
27013	GAAC	15
27030	GTTC	1045
27110	GTTC	313
27173	GTTC	6
27641	GTTC	88
27646	GTTC	29
27667	GTTC	14
27866	GTTC	18
28031	GTTC	7
28523	GTTC	210
28587	GAAC	130
28599	GTTC	1380
29535	GTTC	203
29591	GTTC	69
29672	GTTC	43
29714	GAAC	16
29990	GAAC	228
29998	GAAC	415
30084	GAAC	8
30300	GTTC	30
30315	GAAC	305
30326	GAAC	144
30340	GAAC	585
30528	GTTC	65
30669	GAAC	41
30679	GTTC	662
30922	GAAC	128
30940	GTTC	843
30996	GAAC	62
31099	GAAC	19
31122	GTTC	93
31144	GAAC	58
31183	GAAC	64
31201	GTTC	172
31207	GTTC	12
31248	GAAC	14
31269	GTTC	6
31333	GTTC	800
31408	GAAC	107
31483	GAAC	144
31748	GTTC	166
31972	GTTC	844
31990	GAAC	33
32014	GTTC	283
32063	GTTC	0
32112	GTTC	402
32185	GTTC	79
32655	GAAC	62
32664	GAAC	23
32763	GTTC	19
32862	GTTC	94
32911	GTTC	1475
33459	GAAC	545
33603	GTTC	147
33635	GAAC	379
33670	GTTC	284
33897	GTTC	58
33924	GTTC	53
34005	GTTC	57
34179	GTTC	31
34589	GAAC	455
34950	GTTC	75
35021	GAAC	171
35033	GAAC	198
35144	GTTC	1054
35175	GTTC	114
35349	GAAC	84
35474	GAAC	128
35689	GAAC	16
35880	GTTC	72
36099	GTTC	88
36225	GTTC	2082
36506	GTTC	41
36623	GTTC	70
36674	GAAC	354
36678	GAAC	279
36986	GTTC	35
37099	GTTC	74
37235	GTTC	45
37301	GAAC	622
37682	GTTC	64
37740	GAAC	63
37850	GTTC	54
37991	GTTC	145
38060	GTTC	1955
38297	GAAC	18
38601	GTTC	61
38681	GTTC	4
38875	GAAC	8
38881	GAAC	432
38887	GTTC	416
39013	GTTC	555
39085	GTTC	41
39217	GAAC	96
39394	GTTC	100
39424	GAAC	304
39469	GAAC	205
39511	GAAC	68
39688	GTTC	47
39931	GTTC	33
39998	GTTC	279
40016	GTTC	20
40168	GAAC	17
40376	GTTC	120
40381	GAAC	35
40456	GAAC	63
40669	GAAC	285
41060	GAAC	2036
41344	GAAC	13
41397	GAAC	20
41821	GAAC	82
41914	GAAC	90
42092	GAAC	74
42185	GTTC	271
42280	GTTC	199
42366	GTTC	1579
42513	GTTC	6
42543	GTTC	71
42790	GTTC	185
42831	GTTC	19
42890	GTTC	535
43011	GAAC	80
43273	GTTC	318
43318	GTTC	88
43342	GTTC	58
43574	GTTC	4
43647	GAAC	218
43673	GTTC	24
43768	GAAC	104
43788	GAAC	142
43809	GAAC	290
43823	GTTC	679
43874	GTTC	223
43910	GTTC	71
43922	GTTC	85
43966	GTTC	4
43974	GAAC	7
43983	GAAC	16
44022	GAAC	39
44107	GAAC	42
44266	GTTC	6
44304	GTTC	27
44321	GTTC	9
44397	GAAC	1192
44471	GAAC	156
44679	GTTC	39
44683	GTTC	299
44760	GAAC	17
44793	GAAC	17
44903	GAAC	345
44952	GAAC	425
45270	GTTC	141
45310	GTTC	16
45385	GTTC	100
45399	GTTC	148
45424	GTTC	290
45541	GTTC	277
45757	GTTC	56
45802	GAAC	11
45829	GTTC	12
45835	GTTC	160
45865	GTTC	1444
45919	GTTC	5
46015	GTTC	190
46021	GTTC	196
46192	GTTC	54
46240	GTTC	8
46281	GTTC	128
46423	GTTC	21
46503	GAAC	18
46654	GTTC	161
46710	GAAC	79
46782	GTTC	11
46798	GTTC	124
46887	GTTC	33
46957	GTTC	1434
46993	GAAC	6
47026	GTTC	13
47059	GTTC	48
47064	GAAC	57
47068	GTTC	17
47230	GTTC	49
47239	GTTC	114
47336	GAAC	36
47647	GTTC	377
47752	GTTC	70
47800	GTTC	69
47814	GAAC	45
47845	GTTC	20
47911	GTTC	17
47947	GTTC	126
47966	GAAC	223
47982	GTTC	53
48015	GTTC	90
48048	GTTC	210
48069	GTTC	17
48084	GTTC	53
48090	GTTC	65
48133	GTTC	48
48265	GTTC	277
48317	GAAC	48
48468	GAAC	2613
48500	GAAC	36
48529	GTTC	6
48628	GTTC	27
48634	GAAC	79
49055	GAAC	109
49116	GTTC	414
49917	GAAC	1546
49938	GTTC	11
50150	GTTC	403
50255	GTTC	152
50354	GTTC	138
50420	GAAC	210
50450	GTTC	154
50485	GAAC	35
50516	GTTC	206
50528	GAAC	76
50811	GTTC	16
50837	GAAC	104
51242	GTTC	80
51343	GAAC	148
51363	GTTC	87
51586	GTTC	11
51622	GTTC	1213
51627	GAAC	9
51644	GTTC	3
51782	GTTC	101
51835	GAAC	44
51916	GTTC	202
52184	GTTC	229
52575	GAAC	46
52600	GTTC	48
52609	GAAC	2177
52669	GTTC	35
52719	GAAC	40
52916	GTTC	47
53067	GAAC	17
53113	GTTC	78
53143	GAAC	46
53211	GTTC	6
53248	GAAC	19
53403	GAAC	1644
53484	GAAC	10
53571	GAAC	12
53632	GAAC	52
53650	GAAC	71
53831	GTTC	93
53868	GTTC	32
53972	GAAC	28
54056	GTTC	16
54079	GTTC	191
54161	GAAC	71
54182	GAAC	25
54214	GAAC	7
54321	GTTC	36
54345	GTTC	1313
54385	GTTC	33
54395	GAAC	52
54567	GTTC	20
54969	GAAC	17
54991	GTTC	7
55134	GTTC	0
55143	GTTC	5
55548	GTTC	234
55601	GAAC	84
55631	GTTC	49
55712	GTTC	241
55724	GAAC	194
55772	GTTC	843
55821	GTTC	35
55874	GAAC	18
56015	GAAC	151
56048	GAAC	46
56078	GAAC	135
56087	GTTC	47
56139	GAAC	27
56274	GAAC	795
56388	GTTC	6
56498	GTTC	335
56785	GTTC	246
57117	GTTC	276
57137	GTTC	183
57471	GTTC	827
57621	GTTC	72
57640	GAAC	89
57696	GTTC	40
57920	GTTC	424
58001	GAAC	362
58017	GTTC	268
58121	GAAC	25
58265	GTTC	280
58344	GTTC	221
58379	GTTC	79
58518	GTTC	17
58744	GAAC	36
59050	GTTC	71
59091	GAAC	1595
59165	GAAC	379
59269	GTTC	48
59428	GTTC	44
59493	GAAC	36
59558	GAAC	38
59670	GTTC	16
60084	GTTC	1419
60100	GTTC	41
60288	GTTC	275
60433	GTTC	78
60438	GAAC	119
60505	GTTC	62
60891	GTTC	47
60902	GAAC	177
60942	GAAC	1373
60972	GAAC	284
61036	GTTC	40
61099	GTTC	69
61262	GAAC	71
61397	GAAC	60
61667	GAAC	145
62058	GAAC	20
62121	GAAC	23
62171	GAAC	237
62647	GAAC	1879
62733	GTTC	26
62758	GAAC	91
62783	GTTC	362
63048	GTTC	104
63178	GAAC	187
63389	GTTC	164
63458	GAAC	6
63479	GAAC	530
63488	GAAC	45
63518	GAAC	155
63720	GTTC	88
64015	GTTC	23
64027	GAAC	662
64068	GTTC	37
64526	GTTC	298
64623	GTTC	8
64629	GTTC	7
64853	GTTC	806
65072	GTTC	1698
65078	GTTC	12
65151	GTTC	8
65423	GAAC	200
65631	GAAC	4
65804	GAAC	0
66511	GTTC	5
66550	GAAC	8
66765	GAAC	49
67240	GTTC	109
67324	GTTC	347
67406	GAAC	1134
67430	GAAC	6
67533	GAAC	19
67812	GTTC	150
68055	GTTC	165
68428	GTTC	15
68442	GTTC	8
68497	GTTC	1553
68591	GAAC	3
68634	GTTC	8
68893	GAAC	7
69008	GTTC	74
69356	GTTC	1254
69473	GTTC	66
69612	GAAC	36
69633	GAAC	19
69644	GAAC	76
69867	GTTC	45
70117	GTTC	15
70281	GAAC	267
70295	GAAC	295
70423	GAAC	102
70431	GAAC	17
70569	GAAC	25
70662	GTTC	54
70670	GTTC	629
70816	GTTC	45
70842	GTTC	10
70984	GTTC	4
71025	GAAC	6
71068	GTTC	4
71543	GAAC	5
71595	GTTC	33
71644	GAAC	1147
71663	GAAC	71
71739	GTTC	220
72022	GTTC	230
72350	GAAC	477
72399	GAAC	387
72407	GAAC	158
73132	GAAC	1401
73226	GAAC	41
73427	GTTC	1058
73523	GTTC	39
73729	GAAC	1190
73777	GTTC	25
73912	GTTC	84
74239	GAAC	92
74677	GTTC	72
74791	GAAC	1468
75209	GTTC	13
75245	GAAC	43
75380	GAAC	22
75723	GTTC	1080
75750	GAAC	49
75933	GAAC	65
75998	GTTC	18
76094	GTTC	749
76109	GTTC	238
76357	GTTC	190
76531	GAAC	189
76601	GTTC	158
76690	GTTC	572
76789	GAAC	75
76886	GTTC	324
76973	GTTC	6
76978	GAAC	82
77045	GAAC	41
77113	GAAC	30
77119	GTTC	70
77309	GAAC	246
77340	GTTC	760
77361	GTTC	82
77427	GTTC	119
77550	GTTC	5
77600	GTTC	9
77628	GTTC	761
77640	GAAC	27
77646	GTTC	169
77817	GTTC	20
77911	GAAC	227
78047	GAAC	25
78162	GTTC	97
78297	GAAC	111
78450	GTTC	208
78557	GAAC	9
78611	GTTC	170
78635	GAAC	8
78669	GTTC	27
78702	GTTC	505
78714	GTTC	212
78978	GTTC	139
79140	GTTC	271
79236	GTTC	33
79317	GTTC	145
79487	GAAC	95
79529	GTTC	31
79638	GAAC	143
79923	GTTC	103
79975	GAAC	63
80013	GTTC	21
80049	GAAC	1751
80610	GTTC	93
80665	GAAC	72
80927	GTTC	289
80953	GTTC	103
81099	GAAC	222
81119	GAAC	72
81174	GAAC	18
81214	GAAC	13
81438	GAAC	9
81486	GAAC	1408
81880	GTTC	6
81951	GTTC	6
82108	GTTC	210
82362	GAAC	410
82622	GTTC	8
82652	GAAC	1614
82849	GAAC	4
83052	GTTC	1177
83283	GTTC	107
83502	GTTC	112
83580	GTTC	68
83606	GAAC	569
83682	GAAC	137
83720	GAAC	95
83781	GAAC	68
83837	GTTC	17
83852	GAAC	4
83867	GAAC	25
83932	GAAC	264
84064	GAAC	40
84088	GTTC	172
84203	GTTC	31
84216	GTTC	12
84280	GAAC	7
84373	GAAC	64
84386	GTTC	1982
84445	GAAC	37
84502	GAAC	31
84568	GAAC	46
84622	GAAC	131
84766	GAAC	54
84982	GAAC	235
85573	GTTC	663
85942	GTTC	35
85987	GTTC	257
86047	GTTC	913
86152	GAAC	26
86261	GAAC	10
86319	GTTC	338
86567	GTTC	88
86592	GTTC	23
86603	GTTC	36
86695	GTTC	4
87082	GTTC	60
87549	GTTC	137
87708	GAAC	10
87852	GAAC	133
87930	GTTC	156
88008	GTTC	635
88204	GTTC	351
89080	GTTC	1216
89161	GAAC	117
89182	GAAC	24
89233	GAAC	101
89417	GAAC	89
89575	GAAC	248
89738	GTTC	9
90154	GAAC	315
90200	GAAC	5
90392	GTTC	232
90418	GAAC	5
90507	GAAC	1174
90682	GAAC	8
90725	GTTC	277
90819	GAAC	39
90992	GTTC	1168
91125	GAAC	147
91172	GAAC	201
91331	GAAC	135
91484	GAAC	107
91489	GAAC	90
91646	GAAC	17
91655	GAAC	4
91798	GTTC	1040
92176	GAAC	122
92581	GTTC	1699
92662	GAAC	7
92707	GTTC	38
92946	GAAC	45
93180	GAAC	88
93348	GTTC	143
93718	GTTC	1752
94001	GAAC	28
94163	GAAC	161
94225	GAAC	18
94246	GAAC	132
94333	GAAC	73
94521	GAAC	2065
94650	GAAC	555
94875	GAAC	535
94944	GAAC	68
95468	GAAC	685
95719	GAAC	36
95796	GAAC	43
95805	GAAC	6
95853	GTTC	29
95943	GAAC	72
96184	GTTC	1291
96497	GAAC	11
96509	GAAC	388
96617	GAAC	14
96733	GAAC	249
97428	GAAC	1343
97591	GAAC	189
97605	GTTC	208
97867	GAAC	45
97892	GAAC	436
98174	GAAC	85
98345	GTTC	1622
98393	GTTC	71
98406	GAAC	478
98459	GAAC	7
98552	GTTC	149
98724	GTTC	236
98841	GTTC	38
98970	GTTC	44
98978	GTTC	160
99604	GTTC	39
99857	GAAC	58
99937	GTTC	111
100139	GAAC	64
100199	GAAC	88
100288	GAAC	139
100381	GAAC	114
100385	GAAC	102
100548	GTTC	109
100789	GAAC	749
100796	GTTC	25
101018	GTTC	225
101342	GTTC	98
101350	GTTC	56
101431	GAAC	36
101480	GAAC	480
101674	GAAC	755
101750	GTTC	34
101756	GTTC	411
101893	GTTC	118
102050	GTTC	26
102181	GTTC	565
102238	GTTC	9
102315	GAAC	30
102550	GAAC	188
102790	GAAC	53
102848	GTTC	110
102877	GAAC	1067
103092	GAAC	39
103174	GTTC	635
103242	GTTC	17
103309	GTTC	31
103316	GTTC	217
103325	GTTC	67
103339	GTTC	110
103386	GTTC	48
103501	GTTC	141
103531	GTTC	24
103639	GAAC	64
104022	GTTC	33
104052	GTTC	40
104109	GTTC	1965
104119	GTTC	59
104174	GTTC	9
104258	GTTC	130
105404	GAAC	172
105467	GAAC	445
105472	GAAC	11
105718	GAAC	109
105733	GAAC	93
105784	GAAC	276
105852	GTTC	47
105869	GAAC	1316
105891	GTTC	25
106101	GTTC	485
106255	GAAC	176
106517	GAAC	377
106584	GTTC	21
106754	GTTC	163
106912	GAAC	682
107217	GAAC	118
107434	GAAC	1734
107548	GAAC	331
107766	GTTC	49
107788	GAAC	87
107811	GAAC	29
107865	GTTC	416
108422	GTTC	600
108501	GTTC	45
108507	GTTC	130
108571	GAAC	6
108597	GTTC	582
108737	GTTC	15
109002	GTTC	69
109014	GTTC	81
109180	GAAC	71
109297	GTTC	2006
109327	GAAC	28
109469	GAAC	90
109509	GAAC	5
109549	GTTC	435
109623	GAAC	37
109667	GAAC	67
109784	GAAC	8
109888	GTTC	14
109978	GAAC	55
110165	GAAC	1641
110474	GAAC	96
110592	GAAC	29
110609	GTTC	241
110796	GAAC	15
110843	GAAC	76
110870	GAAC	393
110915	GAAC	248
110944	GAAC	561
111027	GTTC	95
111218	GAAC	239
111615	GAAC	3
111663	GAAC	242
111735	GAAC	76
111879	GTTC	16
111944	GTTC	559
112077	GAAC	147
112124	GAAC	9
112141	GAAC	329
112416	GAAC	48
112455	GAAC	34
112626	GTTC	530
113016	GAAC	23
113058	GTTC	82
113085	GTTC	61
113119	GAAC	4
113515	GAAC	151
113654	GTTC	151
113734	GAAC	38
113769	GTTC	1482
113935	GTTC	19
114349	GAAC	429
114486	GAAC	94
115045	GTTC	263
115069	GTTC	208
115178	GTTC	322
115280	GTTC	1467
115385	GAAC	73
115629	GAAC	195
115919	GAAC	43
115945	GAAC	312
116233	GTTC	318
116444	GAAC	118
116450	GAAC	54
116804	GTTC	1111
117636	GTTC	1029
117901	GAAC	324
117946	GTTC	114
118146	GTTC	747
118206	GTTC	259
118275	GAAC	1245
118564	GTTC	114
118692	GTTC	69
118798	GTTC	19
118821	GAAC	95
118955	GTTC	33
119764	GTTC	1059
119894	GAAC	147
119962	GAAC	7
119994	GAAC	42
120406	GTTC	24
120554	GAAC	81
120624	GAAC	32
121170	GAAC	40
121443	GAAC	183
121455	GAAC	285
121500	GAAC	147
121524	GTTC	12
121644	GAAC	163
121840	GTTC	411
121965	GTTC	20
122115	GAAC	50
122196	GAAC	11
122355	GAAC	1737
122375	GTTC	56
122400	GAAC	16
122427	GAAC	39
122527	GAAC	101
122544	GAAC	42
122939	GAAC	98
122971	GAAC	129
123202	GAAC	20
123319	GAAC	325
123794	GTTC	57
123966	GTTC	42
124031	GTTC	68
124068	GAAC	1220
124148	GAAC	68
124157	GAAC	114
124236	GAAC	67
124337	GAAC	8
124380	GAAC	5
124526	GAAC	5
124602	GTTC	137
124778	GAAC	0
124809	GAAC	12
124882	GTTC	316
125011	GTTC	478
125031	GTTC	10
125061	GTTC	44
125181	GAAC	165
125217	GAAC	31
125355	GAAC	30
125463	GAAC	25
125469	GAAC	645
125622	GTTC	17
125686	GTTC	510
125707	GTTC	607
125770	GTTC	25
125794	GTTC	419
125928	GTTC	107
126027	GAAC	876
126106	GTTC	44
126318	GAAC	444
126393	GAAC	42
126647	GAAC	421
126717	GTTC	402
126738	GTTC	203
126776	GTTC	361
126834	GTTC	134
126917	GTTC	178
126927	GTTC	117
126992	GAAC	47
127002	GTTC	48
127007	GTTC	81
127031	GTTC	237
127042	GTTC	348
127050	GTTC	28
127271	GAAC	718
127426	GAAC	198
127458	GAAC	155
127467	GAAC	46
127507	GTTC	3
127521	GAAC	111
128236	GAAC	16
128286	GTTC	7
128364	GTTC	40
128476	GAAC	1386
128558	GAAC	69
128602	GAAC	14
128689	GAAC	77
128695	GAAC	56
128737	GAAC	106
128804	GTTC	12
128868	GTTC	69
128886	GAAC	86
128941	GAAC	6
129010	GAAC	23
129115	GAAC	0
129122	GAAC	276
129334	GTTC	29
129569	GAAC	662
129815	GTTC	76
130045	GAAC	41
130164	GAAC	57
130175	GAAC	167
130321	GTTC	13
130378	GAAC	261
130503	GAAC	71
130541	GTTC	49
130641	GAAC	601
130653	GAAC	116
130827	GAAC	5
130992	GTTC	316
131083	GTTC	32
131139	GAAC	143
131172	GAAC	44
131282	GAAC	112
131426	GAAC	89
131511	GAAC	27
131777	GAAC	58
131793	GTTC	8
131829	GTTC	4
131952	GAAC	1100
132071	GTTC	3
132346	GAAC	77
132449	GTTC	22
132458	GAAC	118
132623	GTTC	67
132640	GAAC	20
132648	GAAC	81
132710	GTTC	390
132754	GTTC	533
132811	GTTC	126
132926	GAAC	80
133191	GTTC	4
133226	GAAC	6
133312	GTTC	13
133407	GTTC	1580
133547	GAAC	75
133719	GAAC	175
133774	GTTC	46
133873	GTTC	225
134032	GAAC	45
134061	GTTC	54
134066	GTTC	141
134371	GAAC	155
134388	GAAC	18
134829	GTTC	27
135170	GAAC	26
135225	GTTC	11
135230	GTTC	3
135288	GTTC	13
135527	GTTC	66
135582	GTTC	58
135630	GTTC	6
135900	GTTC	112
136139	GTTC	554
136154	GAAC	363
136268	GAAC	893
136276	GAAC	24
136298	GTTC	194
136329	GTTC	8
136387	GAAC	294
136487	GTTC	60
136523	GTTC	446
136529	GTTC	11
136690	GAAC	345
136827	GAAC	44
136968	GAAC	9
137007	GAAC	651
137037	GAAC	144
137049	GTTC	96
137058	GAAC	557
137172	GAAC	55
137187	GTTC	167
137256	GAAC	272
137356	GTTC	117
137396	GAAC	11
137427	GTTC	9
137448	GTTC	25
138267	GTTC	344
138329	GTTC	29
138585	GTTC	897
138945	GTTC	210
138986	GAAC	29
139630	GTTC	5
139685	GAAC	134
139691	GAAC	3
139700	GAAC	5
139739	GTTC	9
139798	GTTC	1152
140180	GAAC	4
140240	GTTC	24
140577	GTTC	1700
140592	GAAC	75
140634	GTTC	39
140663	GTTC	6
140799	GTTC	11
140938	GTTC	20
141139	GAAC	25
141203	GTTC	1449
141358	GAAC	28
141417	GTTC	52
141714	GAAC	26
141801	GTTC	80
142171	GTTC	312
142224	GTTC	280
142273	GAAC	627
142445	GAAC	178
142612	GTTC	46
143002	GTTC	109
143236	GTTC	425
143308	GAAC	82
143347	GAAC	167
143572	GAAC	180
143644	GTTC	10
143804	GTTC	1130
144098	GTTC	8
144218	GTTC	7
144256	GTTC	3
144413	GTTC	9
145228	GTTC	159
145381	GTTC	12
145505	GTTC	120
145519	GTTC	1300
145748	GTTC	27
145806	GTTC	128
146524	GAAC	15
146651	GAAC	4
146692	GAAC	1449
146701	GAAC	168
146706	GAAC	58
146979	GAAC	5
147055	GTTC	4
147104	GTTC	3
147168	GTTC	29
147178	GTTC	28
147193	GAAC	136
147282	GTTC	39
147310	GTTC	932
147347	GTTC	127
147361	GTTC	51
147400	GTTC	369
147532	GTTC	72
147585	GTTC	14
147607	GTTC	19
147640	GTTC	28
147694	GAAC	60
147964	GTTC	92
148163	GTTC	10
148190	GTTC	25
148210	GAAC	1344
148624	GAAC	99
148739	GTTC	772
148793	GAAC	775
148931	GTTC	42
149054	GTTC	24
149077	GAAC	189
149237	GTTC	61
149255	GAAC	93
149566	GTTC	328
149867	GTTC	136
150201	GTTC	39
150206	GAAC	21
150210	GAAC	18
150232	GAAC	36
150257	GAAC	128
150293	GTTC	34
150314	GTTC	1042
150449	GAAC	22
150465	GTTC	7
150548	GTTC	375
150647	GTTC	45
150770	GTTC	59
150920	GTTC	187
151014	GAAC	302
151082	GTTC	504
151134	GAAC	53
151402	GTTC	36
151572	GTTC	203
151824	GTTC	190
152179	GTTC	37
152346	GTTC	1713
152373	GTTC	50
152458	GTTC	197
152640	GTTC	18
152886	GAAC	588
152904	GAAC	113
152975	GTTC	238
153243	GAAC	569
153394	GTTC	225
153619	GTTC	226
153649	GAAC	22
153673	GAAC	663
153678	GAAC	175
153844	GTTC	21
153877	GTTC	35
154003	GAAC	77
154054	GAAC	350
154132	GTTC	71
154162	GTTC	6
154170	GTTC	63
154204	GTTC	89
154360	GTTC	72
154423	GTTC	39
154448	GTTC	404
154550	GAAC	50
154600	GTTC	373
155202	GAAC	402
155408	GTTC	114
155482	GTTC	984
155825	GAAC	47
156017	GTTC	407
156211	GTTC	106
156229	GAAC	320
156520	GTTC	107
156631	GAAC	41
156653	GTTC	8
156683	GTTC	139
156737	GTTC	768
156789	GTTC	181
156986	GTTC	368
157035	GAAC	18
157174	GAAC	34
157269	GTTC	170
157466	GTTC	47
157592	GTTC	51
157684	GAAC	207
157789	GAAC	262
158191	GAAC	384
158241	GAAC	289
158275	GTTC	450
158326	GTTC	38
158675	GTTC	432
158720	GTTC	306
158725	GTTC	22
158900	GTTC	120
158983	GAAC	163
159124	GTTC	71
159224	GTTC	296
159239	GTTC	378
159254	GTTC	47
159484	GTTC	221
159504	GAAC	236
159678	GTTC	528
159710	GAAC	19
159901	GTTC	147
160000	GAAC	237
160314	GAAC	19
160330	GTTC	19
160341	GTTC	35
160446	GTTC	34
160472	GTTC	17
160545	GTTC	12
160648	GTTC	1558
160694	GTTC	7
160770	GTTC	311
160985	GAAC	66
161355	GAAC	188
161421	GAAC	630
161591	GAAC	8
161656	GTTC	16
161961	GAAC	188
162206	GTTC	61
162252	GAAC	60
162261	GAAC	1409
162563	GTTC	14
162623	GAAC	532
162837	GAAC	13
162950	GAAC	28
163004	GTTC	48
163061	GTTC	33
163100	GAAC	138
163163	GTTC	42
163207	GTTC	64
163478	GTTC	142
163496	GAAC	913
163574	GAAC	649
163625	GTTC	213
163916	GTTC	127
164060	GTTC	6
164067	GAAC	116
164132	GAAC	247
164156	GTTC	253
164480	GTTC	173
164546	GAAC	239
164657	GAAC	346
164663	GAAC	77
164798	GTTC	11
165197	GTTC	246
165206	GAAC	95
165326	GTTC	325
165362	GTTC	143
165446	GTTC	1070
165963	GTTC	7
166007	GTTC	117
166011	GAAC	90
166031	GTTC	38
166161	GAAC	84
166175	GAAC	43
166217	GAAC	45
166481	GAAC	101
166523	GAAC	11
166605	GTTC	928
166656	GTTC	8
166917	GTTC	119
167072	GTTC	364
167304	GTTC	84
167388	GTTC	146
167640	GTTC	141
167702	GAAC	408
168063	GTTC	661
168099	GTTC	15
168218	GAAC	139
168238	GTTC	181
168275	GTTC	416
168366	GAAC	21
168388	GTTC	27
168444	GAAC	74
168853	GTTC	76
168866	GTTC	8
168888	GTTC	36
168956	GAAC	8
169042	GAAC	1550
169176	GAAC	29
169184	GAAC	235
169300	GAAC	173
169453	GTTC	156
169635	GTTC	14
169932	GTTC	11
169972	GTTC	25
170178	GTTC	15
170240	GTTC	1705
170282	GAAC	11
170435	GTTC	89
171108	GAAC	351
171283	GTTC	25
171330	GAAC	4
171423	GAAC	3
171456	GTTC	4
171461	GAAC	618
171519	GTTC	8
171539	GAAC	28
171557	GAAC	4
171849	GTTC	122
171884	GTTC	6
172031	GTTC	7
172082	GAAC	17
172290	GAAC	831
172413	GAAC	34
172528	GAAC	34
172572	GAAC	72
172761	GTTC	450
172839	GAAC	9
173380	GTTC	758
173407	GTTC	9
173713	GTTC	0
173908	GTTC	10
174059	GAAC	40
174258	GAAC	227
174454	GAAC	42
174553	GTTC	40
175113	GAAC	780
175129	GTTC	10
175140	GAAC	6
175265	GTTC	8
175345	GTTC	5
175376	GAAC	10
176078	GAAC	1048
176750	GTTC	38
176949	GTTC	83
177065	GTTC	1090
177225	GTTC	252
177256	GTTC	361
177411	GTTC	309
177486	GAAC	34
177513	GTTC	3
177718	GAAC	163
177934	GAAC	114
177943	GAAC	195
178048	GAAC	313
178279	GAAC	6
178289	GAAC	0
178310	GAAC	11
178332	GAAC	5
178402	GTTC	37
178749	GTTC	331
178961	GAAC	201
179062	GAAC	71
179321	GTTC	242
179478	GTTC	393
179563	GTTC	7
179788	GAAC	26
179792	GTTC	38
179971	GAAC	140
179981	GTTC	546
179987	GTTC	229
180055	GAAC	32
180188	GTTC	24
180220	GTTC	254
180274	GTTC	174
180535	GAAC	128
180652	GTTC	839
180657	GTTC	93
180704	GTTC	94
180728	GAAC	410
180866	GAAC	5
180938	GTTC	32
180961	GTTC	167
181011	GTTC	26
181231	GAAC	511
181376	GAAC	136
181448	GAAC	56
181484	GTTC	60
181543	GTTC	43
181589	GTTC	24
181729	GAAC	18
182081	GAAC	27
182160	GAAC	91
182170	GTTC	333
182182	GTTC	13
182242	GTTC	116
182320	GTTC	128
182464	GTTC	56
182536	GAAC	217
182915	GAAC	119
182999	GAAC	169
183331	GTTC	307
183410	GTTC	49
183562	GAAC	10
183779	GTTC	1275
183844	GAAC	14
184057	GTTC	25
184173	GTTC	8
184220	GTTC	7
184341	GTTC	0
184541	GTTC	29
184612	GAAC	11
184655	GAAC	363
184945	GTTC	1375
185458	GTTC	23
185761	GTTC	28
185767	GAAC	67
185835	GTTC	8
185973	GTTC	233
186198	GAAC	1866
186316	GTTC	23
186437	GAAC	19
186484	GTTC	69
186828	GTTC	408
186832	GTTC	224
186931	GTTC	240
187126	GAAC	93
187138	GAAC	76
187422	GAAC	186
187494	GTTC	37
187593	GAAC	33
187619	GTTC	68
187761	GAAC	1188
187944	GTTC	30
188230	GAAC	104
188348	GAAC	79
188599	GTTC	13
188617	GTTC	1192
188768	GAAC	220
188831	GTTC	520
189021	GTTC	164
189212	GTTC	18
189443	GAAC	579
189496	GAAC	256
189802	GTTC	126
189838	GAAC	31
189902	GTTC	82
189973	GTTC	105
190152	GAAC	253
190226	GAAC	77
190327	GTTC	179
190423	GAAC	27
190653	GTTC	300
190744	GAAC	18
190837	GAAC	1283
190881	GTTC	348
190988	GTTC	46
191024	GAAC	72
191182	GAAC	80
191190	GTTC	22
191399	GTTC	196
191452	GAAC	41
191458	GTTC	125
191632	GAAC	106
192068	GTTC	1633
192176	GTTC	34
192287	GTTC	99
192332	GTTC	7
192574	GAAC	40
192659	GAAC	35
192709	GAAC	15
193109	GTTC	50
193209	GAAC	11
193257	GAAC	21
193319	GTTC	17
193441	GTTC	2532
193584	GTTC	20
193825	GTTC	154
193849	GTTC	133
193944	GAAC	37
194350	GAAC	95
194657	GAAC	961
194700	GTTC	59
195052	GTTC	135
195056	GAAC	28
195071	GAAC	1160
195242	GAAC	42
195413	GAAC	91
195445	GAAC	427
195932	GAAC	60
196008	GTTC	107
196204	GTTC	130
196227	GTTC	1497
196259	GAAC	53
196293	GAAC	55
196390	GTTC	16
196541	GAAC	53
196620	GAAC	192
196841	GAAC	23
196901	GAAC	233
196952	GAAC	110
197000	GAAC	38
197075	GAAC	495
197219	GAAC	55
197427	GTTC	275
197451	GAAC	187
197505	GTTC	269
197766	GAAC	475
197780	GAAC	48
197912	GAAC	565
198180	GTTC	243
198233	GAAC	74
198258	GAAC	107
198590	GAAC	333
198620	GAAC	652
198737	GAAC	275
198830	GAAC	16
198949	GAAC	148
198972	GAAC	134
199315	GAAC	673
199783	GAAC	2287
200077	GTTC	20
200324	GTTC	54
200629	GAAC	2573
200716	GAAC	101
201030	GTTC	342
201077	GAAC	88
201222	GTTC	197
201435	GAAC	32
201633	GTTC	3322
202055	GTTC	17
202440	GTTC	89
202478	GAAC	14
202490	GTTC	233
202866	GTTC	53
202878	GTTC	72
202883	GAAC	106
203070	GTTC	1401
203259	GTTC	444
203480	GTTC	30
203711	GTTC	20
204300	GTTC	418
204314	GTTC	103
204383	GAAC	89
204685	GTTC	77
204742	GAAC	30
204760	GAAC	1226
204945	GAAC	421
205194	GAAC	273
205596	GAAC	137
205757	GAAC	120
205865	GTTC	1635
205947	GTTC	21
205985	GAAC	64
206008	GAAC	141
206075	GTTC	92
206121	GAAC	175
206156	GTTC	144
207007	GTTC	209
207079	GAAC	10
207096	GTTC	59
207465	GAAC	127
207501	GTTC	1197
207646	GAAC	63
207682	GTTC	110
207789	GTTC	14
207865	GAAC	82
207880	GTTC	49
208116	GAAC	163
208269	GAAC	75
208332	GTTC	7
208342	GAAC	20
208457	GAAC	27
208589	GTTC	32
208636	GTTC	2532
208774	GAAC	16
208855	GTTC	23
209766	GTTC	38
209846	GTTC	4
209878	GAAC	212
209957	GTTC	59
210132	GTTC	1774
210248	GAAC	26
210281	GAAC	119
210502	GTTC	42
210809	GAAC	100
211069	GTTC	180
211103	GAAC	128
211111	GAAC	543
211121	GAAC	44
211213	GAAC	106
211285	GTTC	39
211316	GAAC	50
211364	GAAC	76
211467	GTTC	4
211663	GTTC	1552
211990	GAAC	45
212254	GTTC	57
212270	GAAC	51
212307	GTTC	255
212342	GTTC	11
212701	GTTC	241
212858	GTTC	3
212865	GTTC	17
213055	GAAC	1352
213264	GTTC	15
213775	GAAC	190
213993	GTTC	5
214509	GAAC	27
214716	GAAC	295
214784	GTTC	7
214967	GTTC	1237
215000	GAAC	77
215312	GAAC	43
215619	GAAC	6
215731	GTTC	771
215775	GTTC	8
215792	GAAC	175
215797	GAAC	418
215910	GTTC	14
215935	GTTC	149
216290	GTTC	17
216476	GTTC	54
216592	GAAC	60
216696	GAAC	7
216774	GAAC	1963
217079	GTTC	328
217270	GTTC	96
217370	GAAC	125
217395	GTTC	147
217587	GTTC	43
217605	GTTC	7
217726	GAAC	24
217905	GTTC	16
218008	GAAC	1391
218190	GTTC	43
218476	GTTC	67
218515	GTTC	3
218558	GAAC	11
218877	GAAC	1143
218971	GTTC	376
219015	GAAC	174
219425	GTTC	145
219750	GTTC	13
219890	GAAC	6
220108	GAAC	129
220297	GAAC	37
220312	GTTC	75
220675	GTTC	35
220758	GAAC	1896
220783	GTTC	89
221151	GAAC	159
221172	GTTC	113
221232	GTTC	15
221669	GAAC	1803
221772	GTTC	12
221831	GTTC	14
222167	GTTC	662
222236	GAAC	116
222382	GAAC	153
222394	GAAC	7
222478	GAAC	152
222554	GTTC	80
222566	GAAC	192
222591	GAAC	84
222653	GAAC	166
222699	GTTC	37
222731	GAAC	228
222800	GAAC	60
222844	GTTC	92
222935	GAAC	681
222962	GAAC	774
223031	GAAC	11
223109	GAAC	349
223211	GAAC	27
223265	GAAC	517
223413	GTTC	58
223424	GTTC	414
223653	GAAC	5
223701	GAAC	7
224016	GAAC	72
224281	GTTC	120
224471	GAAC	7
224507	GAAC	197
224576	GAAC	955
224770	GTTC	8
224950	GAAC	601
225122	GTTC	268
225726	GTTC	18
225880	GTTC	361
225965	GAAC	6
226008	GTTC	42
226066	GTTC	134
226113	GAAC	1078
226319	GAAC	115
226345	GAAC	366
226444	GAAC	161
226493	GTTC	115
226564	GAAC	316
226570	GAAC	90
226594	GAAC	59
226766	GTTC	360
226999	GTTC	373
227074	GTTC	20
227081	GTTC	17
227433	GTTC	1854
227779	GTTC	110
227959	GTTC	388
228326	GAAC	259
228422	GAAC	1302
228625	GTTC	48
228636	GTTC	99
228945	GTTC	75
229049	GTTC	1011
229100	GAAC	50
229226	GAAC	13
229396	GAAC	16
229798	GTTC	14
229918	GTTC	1416
229934	GTTC	42
229962	GTTC	67
229968	GAAC	18
230067	GAAC	27
230186	GAAC	154
230287	GTTC	50
230343	GAAC	71
230466	GAAC	1058
230756	GTTC	330
231201	GAAC	89
231275	GTTC	18
231308	GTTC	5
231622	GAAC	154
231872	GAAC	40
231906	GTTC	1450
231925	GTTC	36
232103	GAAC	19
232235	GAAC	85
232325	GAAC	28
232518	GTTC	4
233061	GAAC	5
233220	GTTC	1894
233229	GAAC	18
233309	GTTC	12
233393	GAAC	21
233475	GAAC	5
233760	GAAC	22
233776	GAAC	434
234014	GTTC	232
234063	GTTC	41
234117	GTTC	53
234171	GTTC	284
234285	GAAC	76
234336	GAAC	542
234711	GAAC	87
234942	GTTC	78
234994	GTTC	201
235172	GTTC	160
235239	GAAC	1185
235456	GTTC	462
235507	GAAC	236
235986	GAAC	19
236060	GAAC	31
236489	GTTC	52
236496	GTTC	47
236532	GTTC	2432
236709	GTTC	60
236775	GTTC	15
236826	GTTC	146
236906	GTTC	128
236964	GTTC	110
237322	GTTC	1091
237334	GTTC	104
237796	GTTC	46
237856	GAAC	65
237874	GTTC	400
238038	GTTC	397
238507	GTTC	812
238824	GAAC	435
239053	GAAC	126
239236	GTTC	201
239669	GAAC	1681
239689	GAAC	275
239848	GAAC	44
239866	GAAC	25
239905	GAAC	38
240113	GAAC	30
240152	GAAC	94
240255	GAAC	466
240290	GTTC	303
240510	GAAC	423
240941	GTTC	162
241026	GTTC	124
241366	GTTC	130
241474	GTTC	207
241537	GTTC	1016
241617	GTTC	9
241707	GTTC	110
241879	GTTC	20
241926	GTTC	141
242122	GAAC	110
242379	GAAC	66
242389	GTTC	190
242520	GTTC	33
242535	GAAC	21
242585	GTTC	954
242590	GAAC	55
242914	GAAC	73
243017	GTTC	127
243049	GAAC	157
243056	GAAC	154
243325	GAAC	42
243483	GAAC	222
243693	GTTC	22
243728	GTTC	81
243885	GTTC	2192
244618	GAAC	283
244940	GAAC	28
245104	GTTC	679
245164	GTTC	445
245304	GTTC	465
245434	GAAC	69
245535	GTTC	55
245556	GTTC	60
245617	GTTC	77
245733	GAAC	16
245884	GAAC	187
245912	GAAC	16
246018	GTTC	1516
246159	GAAC	27
246558	GAAC	148
246693	GAAC	70
246939	GAAC	8
246947	GTTC	4
246956	GTTC	383
246990	GTTC	19
247165	GAAC	1511
247255	GAAC	49
247426	GAAC	41
247444	GAAC	108
247631	GTTC	265
247702	GAAC	165
247756	GAAC	106
247874	GTTC	141
248369	GTTC	1711
248494	GTTC	9
248509	GAAC	56
248573	GTTC	84
248616	GTTC	331
249117	GTTC	13
249235	GAAC	94
249286	GAAC	20
249319	GAAC	1397
249440	GAAC	157
249583	GAAC	212
249675	GAAC	9
249788	GTTC	493
250174	GAAC	266
250386	GAAC	242
250610	GTTC	25
250738	GAAC	1399
250803	GTTC	117
250971	GAAC	15
250997	GTTC	138
251001	GTTC	83
251514	GTTC	44
251583	GAAC	8
251661	GAAC	61
251724	GAAC	18
251736	GAAC	1245
251745	GAAC	50
251799	GAAC	45
251859	GAAC	127
251928	GAAC	64
251988	GAAC	99
252179	GTTC	1017
252220	GAAC	18
252234	GAAC	82
252279	GAAC	258
252306	GTTC	8
252315	GAAC	9
252423	GTTC	72
252438	GAAC	108
252447	GAAC	33
252459	GTTC	13
252537	GAAC	216
252687	GAAC	92
252730	GAAC	84
252762	GAAC	312
252826	GTTC	75
252936	GAAC	39
252996	GAAC	746
253011	GAAC	72
253018	GTTC	187
253202	GTTC	49
253242	GTTC	253
253254	GTTC	33
253267	GAAC	66
253349	GTTC	211
253703	GTTC	69
253774	GTTC	589
253857	GAAC	89
253926	GTTC	32
253957	GTTC	354
254094	GAAC	183
254176	GAAC	291
254187	GTTC	261
254265	GTTC	27
254382	GAAC	800
254421	GAAC	44
254638	GTTC	103
255290	GTTC	8
255354	GAAC	821
255548	GAAC	137
255555	GTTC	41
255561	GAAC	18
255625	GAAC	301
255714	GAAC	9
255753	GTTC	85
255813	GTTC	1383
255983	GAAC	152
256580	GTTC	604
256597	GTTC	14
256871	GAAC	599
256887	GTTC	19
257034	GAAC	60
257147	GAAC	381
257278	GAAC	22
257286	GTTC	185
257316	GTTC	23
257397	GAAC	147
257415	GTTC	146
257454	GTTC	35
257599	GAAC	212
257620	GAAC	786
257987	GTTC	5
257994	GAAC	25
258078	GAAC	47
258323	GAAC	1103
258568	GAAC	11
258776	GTTC	17
258806	GAAC	420
258857	GTTC	8
258882	GTTC	251
258911	GTTC	263
259002	GTTC	217
259083	GTTC	495
259375	GAAC	132
259617	GTTC	603
259666	GAAC	282
259686	GAAC	145
259857	GAAC	398
259905	GAAC	206
259952	GAAC	110
259966	GAAC	123
260094	GTTC	366
260288	GAAC	77
260607	GAAC	834
260694	GAAC	904
260739	GTTC	202
260822	GTTC	91
260826	GTTC	42
261078	GAAC	76
261182	GTTC	56
261283	GAAC	303
261483	GAAC	1440
261584	GTTC	127
261834	GTTC	268
261858	GTTC	148
262014	GAAC	130
[truncated: 36,162 more rows]
