# Supplementary material for: Development of Methods Derived from Iodine-Induced Specific Cleavage for Identification and Quantitation of DNA Phosphorothioate Modifications
Source: Biomolecules. 2020 Oct 28;10(11):1491. doi: 10.3390/biom10111491 (PMC7692671; doi:10.3390/biom10111491)
Supplement: Supplementary file 1 [file biomolecules-10-01491-s001.zip › Table S2.xlsx]

## Sheet: S87 PT ratio
PT-IC-seq sequencing analysis of phosphorothioate modifications throughout the Salmonella enterica serovar Cerro 87 genome
Position	Motifs	Ended reads	Random reads	Total reads	PT ratio(%)
75	GAAC	0	1	1	0
98	GAAC	0	110	110	0
140	GTTC	0	405	405	0
418	GTTC	0	0	0	-
426	GTTC	0	0	0	-
512	GTTC	0	292	292	0
531	GAAC	3	398	401	0.74813
728	GAAC	13	53	66	19.697
744	GTTC	0	0	0	-
755	GTTC	0	0	0	-
769	GTTC	0	0	0	-
897	GTTC	9	1042	1051	0.856327
956	GAAC	14	1627	1641	0.853138
1061	GTTC	8	1046	1054	0.759013
1267	GTTC	0	1383	1383	0
1351	GTTC	5	1300	1305	0.383142
1369	GAAC	374	676	1050	35.619
1425	GAAC	6	196	202	2.9703
1529	GTTC	0	502	502	0
1552	GAAC	0	498	498	0
1574	GTTC	0	501	501	0
1613	GTTC	0	506	506	0
1680	GAAC	3	1039	1042	0.287908
1693	GTTC	11	765	776	1.41753
1701	GAAC	5	1146	1151	0.434405
1765	GTTC	10	1691	1701	0.587889
1840	GAAC	13	1414	1427	0.911002
1915	GAAC	18	1431	1449	1.24224
2175	GTTC	112	1145	1257	8.9101
2399	GTTC	23	563	586	3.92491
2417	GAAC	15	338	353	4.24929
2492	GAAC	6	901	907	0.661521
2670	GTTC	41	2641	2682	1.52871
4404	GTTC	33	3233	3266	1.01041
4631	GAAC	27	3252	3279	0.823422
5402	GTTC	39	2966	3005	1.29784
5485	GAAC	17	2785	2802	0.606709
5569	GAAC	47	2685	2732	1.72035
5596	GAAC	47	2815	2862	1.64221
5627	GAAC	10	3101	3111	0.32144
5866	GTTC	15	4539	4554	0.329381
5926	GAAC	47	3978	4025	1.1677
5978	GAAC	1740	4024	5764	30.1874
6135	GTTC	61	3155	3216	1.89677
6551	GTTC	148	6637	6785	2.18128
6632	GAAC	119	7140	7259	1.63934
7075	GTTC	44	5246	5290	0.831758
7126	GTTC	111	5087	5198	2.13544
7168	GTTC	30	5978	6008	0.499334
7294	GAAC	303	8374	8677	3.49199
7395	GTTC	67	7853	7920	0.84596
7561	GAAC	130	7119	7249	1.79335
7650	GAAC	60	6278	6338	0.946671
7702	GAAC	36	5787	5823	0.618238
7720	GAAC	65	5622	5687	1.14296
7871	GAAC	38	5655	5693	0.667486
7965	GAAC	44	4551	4595	0.957563
8150	GAAC	12	4835	4847	0.247576
8190	GTTC	1644	4654	6298	26.1035
8204	GAAC	43	4812	4855	0.885685
8441	GAAC	25	4988	5013	0.498703
8500	GAAC	57	5600	5657	1.0076
8510	GTTC	45	5488	5533	0.813302
8588	GAAC	72	5518	5590	1.28801
9051	GTTC	1434	4615	6049	23.7064
9122	GAAC	24	3973	3997	0.60045
9325	GAAC	13	4317	4330	0.300231
9361	GAAC	43	4814	4857	0.88532
9463	GAAC	109	5838	5947	1.83286
9519	GAAC	41	6299	6340	0.646688
9523	GAAC	44	6388	6432	0.68408
9844	GTTC	40	7368	7408	0.539957
9991	GTTC	40	6726	6766	0.591191
10016	GAAC	50	6334	6384	0.783208
10195	GTTC	27	5115	5142	0.525088
10210	GAAC	88	5116	5204	1.69101
10468	GTTC	76	5436	5512	1.37881
10513	GTTC	2084	5391	7475	27.8796
10522	GAAC	65	5435	5500	1.18182
10674	GTTC	49	3315	3364	1.4566
10878	GAAC	49	5283	5332	0.91898
10882	GAAC	47	5277	5324	0.882795
11566	GAAC	1421	5317	6738	21.0893
11589	GAAC	70	5137	5207	1.34434
11850	GAAC	49	5046	5095	0.961727
11903	GTTC	32	5154	5186	0.617046
12166	GAAC	217	6774	6991	3.10399
12420	GAAC	56	6134	6190	0.904685
12664	GAAC	28	4425	4453	0.62879
12800	GTTC	24	4946	4970	0.482897
12886	GAAC	56	4704	4760	1.17647
12893	GTTC	2489	5280	7769	32.0376
13033	GTTC	33	6720	6753	0.488672
13219	GAAC	68	5602	5670	1.19929
13310	GTTC	44	5697	5741	0.766417
13862	GAAC	37	5208	5245	0.705434
14094	GAAC	30	4289	4319	0.694605
14167	GAAC	72	5827	5899	1.22055
14193	GTTC	21	5636	5657	0.371221
14288	GTTC	39	4883	4922	0.792361
14308	GTTC	1884	4352	6236	30.2117
14343	GAAC	17	3993	4010	0.42394
14542	GTTC	56	4080	4136	1.35397
14786	GAAC	47	5435	5482	0.857351
14824	GTTC	33	5676	5709	0.578035
14858	GAAC	33	5887	5920	0.557432
14917	GAAC	158	6112	6270	2.51994
14991	GTTC	138	6281	6419	2.14987
15139	GAAC	138	6141	6279	2.1978
15203	GAAC	222	6155	6377	3.48126
15472	GAAC	199	6651	6850	2.90511
15502	GAAC	115	6834	6949	1.65491
15626	GAAC	84	6504	6588	1.27505
15659	GAAC	86	6217	6303	1.36443
15731	GAAC	58	6259	6317	0.918157
15750	GAAC	57	6303	6360	0.896226
15830	GAAC	36	6429	6465	0.556845
15959	GTTC	35	5934	5969	0.586363
16061	GAAC	102	5625	5727	1.78104
16163	GAAC	23	5150	5173	0.444616
16297	GAAC	11	6120	6131	0.179416
16316	GAAC	8	5863	5871	0.136263
16349	GAAC	19	5486	5505	0.345141
16355	GAAC	20	5463	5483	0.364764
16385	GAAC	40	5368	5408	0.739645
16402	GAAC	2095	5166	7261	28.8528
16439	GAAC	21	4907	4928	0.426136
16511	GAAC	17	5429	5446	0.312156
16535	GAAC	78	5644	5722	1.36316
16541	GTTC	50	5598	5648	0.885269
16612	GAAC	19	4191	4210	0.451306
16625	GTTC	32	4497	4529	0.706558
16712	GAAC	43	5263	5306	0.810403
16760	GAAC	23	5073	5096	0.451334
16943	GTTC	24	4067	4091	0.586654
17131	GAAC	29	4561	4590	0.631808
17156	GTTC	1798	4815	6613	27.1889
17230	GAAC	27	5453	5480	0.492701
17302	GAAC	74	6125	6199	1.19374
17561	GAAC	110	6531	6641	1.65638
17579	GAAC	45	6615	6660	0.675676
17672	GAAC	93	7272	7365	1.26273
17918	GAAC	84	7524	7608	1.1041
17966	GTTC	49	7316	7365	0.665309
17994	GAAC	62	7337	7399	0.837951
18049	GAAC	75	6618	6693	1.12057
18167	GAAC	69	6400	6469	1.06663
18188	GTTC	30	6229	6259	0.47931
18212	GAAC	30	5903	5933	0.505646
18272	GAAC	42	4595	4637	0.905758
18320	GAAC	50	3321	3371	1.48324
18334	GTTC	69	3334	3403	2.02762
18365	GAAC	21	5262	5283	0.397501
18416	GAAC	12	4775	4787	0.250679
18431	GTTC	18	4675	4693	0.38355
18486	GTTC	1743	4767	6510	26.7742
18535	GAAC	23	5196	5219	0.440697
18553	GTTC	18	5278	5296	0.339879
18653	GAAC	52	3389	3441	1.51119
18988	GAAC	90	6450	6540	1.37615
19040	GAAC	51	6670	6721	0.758816
19049	GAAC	94	6636	6730	1.39673
19154	GAAC	40	6419	6459	0.619291
19335	GTTC	258	6777	7035	3.66738
19453	GAAC	91	6040	6131	1.48426
19665	GTTC	57	5709	5766	0.988554
20494	GTTC	38	5321	5359	0.709088
20551	GAAC	44	4282	4326	1.01711
20707	GAAC	1616	5153	6769	23.8735
20856	GAAC	40	4168	4208	0.95057
20868	GAAC	36	3270	3306	1.08893
20872	GTTC	35	3319	3354	1.04353
20967	GTTC	26	4290	4316	0.60241
21033	GTTC	47	3789	3836	1.22523
21167	GAAC	38	4618	4656	0.816151
21199	GTTC	875	4811	5686	15.3887
21234	GAAC	34	5075	5109	0.665492
21297	GTTC	34	5377	5411	0.62835
21424	GAAC	41	4829	4870	0.841889
21450	GAAC	75	4872	4947	1.51607
21615	GTTC	41	4380	4421	0.927392
22035	GTTC	1462	4256	5718	25.5684
22279	GAAC	11	4614	4625	0.237838
22306	GAAC	1296	4470	5766	22.4766
22315	GAAC	63	4427	4490	1.40312
22320	GTTC	39	4490	4529	0.861117
22337	GAAC	7	4554	4561	0.153475
22475	GTTC	22	3746	3768	0.583864
22496	GTTC	88	4050	4138	2.12663
22528	GAAC	57	4507	4564	1.2489
22609	GTTC	44	4868	4912	0.895765
22700	GAAC	30	5089	5119	0.586052
23133	GAAC	32	5749	5781	0.553537
23172	GAAC	42	5650	5692	0.737878
23202	GTTC	37	5758	5795	0.638481
23246	GAAC	120	6084	6204	1.93424
23252	GTTC	69	6152	6221	1.10915
23588	GTTC	2103	5595	7698	27.3188
23600	GTTC	39	5092	5131	0.760086
23646	GAAC	17	4930	4947	0.343643
23651	GTTC	15	4943	4958	0.302541
23744	GTTC	56	3317	3373	1.66024
23781	GTTC	20	3906	3926	0.509424
23928	GAAC	32	4354	4386	0.729594
23936	GAAC	89	4290	4379	2.03243
24165	GTTC	19	3019	3038	0.625411
24183	GTTC	28	2772	2800	1
24364	GAAC	1267	3796	5063	25.0247
24466	GAAC	9	4533	4542	0.198151
24541	GTTC	28	3108	3136	0.892857
24625	GAAC	27	4112	4139	0.652331
24844	GAAC	34	3922	3956	0.859454
25118	GTTC	14	3882	3896	0.359343
25171	GAAC	1642	4047	5689	28.8627
25179	GTTC	38	4139	4177	0.909744
25673	GTTC	34	5442	5476	0.620891
25682	GAAC	30	5514	5544	0.541126
25705	GTTC	36	5485	5521	0.652056
25869	GTTC	46	5765	5811	0.791602
26088	GAAC	116	5390	5506	2.10679
26141	GAAC	30	5412	5442	0.551268
26278	GAAC	43	3491	3534	1.21675
26432	GAAC	70	5027	5097	1.37336
26438	GAAC	1698	4332	6030	28.1592
26463	GAAC	26	3970	3996	0.650651
26495	GAAC	34	4134	4168	0.815739
26588	GAAC	71	3506	3577	1.9849
26598	GTTC	46	3117	3163	1.45432
26627	GAAC	44	3348	3392	1.29717
26718	GAAC	78	4615	4693	1.66205
26928	GAAC	25	5061	5086	0.491545
27038	GAAC	81	5627	5708	1.41906
28162	GTTC	57	6594	6651	0.857014
28237	GTTC	74	6488	6562	1.1277
28431	GTTC	30	4157	4187	0.716503
28573	GTTC	21	5328	5349	0.392597
28618	GAAC	1649	4480	6129	26.9049
28806	GAAC	41	3110	3151	1.30117
28920	GTTC	44	4354	4398	1.00045
29018	GTTC	20	4895	4915	0.406918
29223	GAAC	50	5608	5658	0.883704
29555	GAAC	40	3038	3078	1.29955
29616	GAAC	14	5047	5061	0.276625
29633	GTTC	21	4943	4964	0.423046
29730	GTTC	1466	4007	5473	26.786
29932	GTTC	24	3375	3399	0.70609
30035	GTTC	34	4845	4879	0.696864
30068	GAAC	27	4965	4992	0.540865
30113	GTTC	22	5177	5199	0.423158
30558	GTTC	55	6114	6169	0.891555
30626	GAAC	42	5958	6000	0.7
30681	GTTC	45	5685	5730	0.78534
30752	GTTC	81	5484	5565	1.45553
30890	GTTC	71	3419	3490	2.03438
31014	GAAC	20	4709	4729	0.422922
31047	GTTC	1569	4480	6049	25.9382
31061	GTTC	43	4391	4434	0.969779
31411	GTTC	42	4461	4503	0.932712
31433	GAAC	31	4317	4348	0.712971
31444	GAAC	27	4294	4321	0.624855
31484	GAAC	62	4241	4303	1.44086
31514	GAAC	72	4268	4340	1.65899
31578	GTTC	40	4475	4515	0.885936
31913	GAAC	21	4744	4765	0.440714
31932	GTTC	1900	4320	6220	30.5466
32668	GTTC	107	5521	5628	1.90121
33415	GTTC	164	5404	5568	2.9454
33456	GAAC	33	4933	4966	0.664519
33541	GAAC	1704	4594	6298	27.0562
33575	GTTC	20	4501	4521	0.44238
33597	GTTC	18	4583	4601	0.391219
33621	GAAC	31	4772	4803	0.64543
33811	GTTC	37	4870	4907	0.754025
34069	GTTC	97	6843	6940	1.39769
34234	GTTC	37	7713	7750	0.477419
34507	GAAC	113	7037	7150	1.58042
34894	GAAC	18	4268	4286	0.419972
34930	GAAC	31	3776	3807	0.814289
35065	GTTC	21	4470	4491	0.467602
35133	GTTC	2004	4811	6815	29.4057
35390	GAAC	47	5231	5278	0.890489
35435	GTTC	26	5019	5045	0.515362
35618	GTTC	31	3306	3337	0.928978
35779	GAAC	2060	5202	7262	28.3668
35794	GAAC	44	5806	5850	0.752137
35859	GAAC	24	6307	6331	0.379087
35871	GTTC	29	6459	6488	0.446979
36216	GTTC	31	5792	5823	0.532372
36286	GTTC	47	5715	5762	0.815689
36336	GTTC	137	6047	6184	2.21539
36405	GTTC	53	6291	6344	0.835435
36571	GAAC	55	6169	6224	0.883676
36588	GAAC	88	6154	6242	1.4098
36658	GAAC	40	5616	5656	0.707214
36663	GAAC	27	5562	5589	0.483092
36693	GAAC	93	4982	5075	1.83251
36730	GAAC	13	4372	4385	0.296465
36798	GAAC	23	3765	3788	0.607181
36996	GTTC	44	4473	4517	0.974098
37048	GAAC	1706	4252	5958	28.6338
37114	GAAC	22	4211	4233	0.519726
37147	GAAC	14	4396	4410	0.31746
37237	GAAC	22	3078	3100	0.709677
37333	GAAC	35	4361	4396	0.796178
37504	GTTC	22	4710	4732	0.46492
37571	GAAC	35	4382	4417	0.792393
37598	GAAC	32	4431	4463	0.717006
37840	GAAC	26	2914	2940	0.884354
38019	GTTC	1839	4522	6361	28.9105
38096	GAAC	26	5290	5316	0.48909
38137	GAAC	38	5842	5880	0.646259
38293	GAAC	69	5391	5460	1.26374
38322	GTTC	40	5364	5404	0.740192
38356	GTTC	35	5100	5135	0.681597
38364	GTTC	54	5150	5204	1.03766
38389	GTTC	39	5102	5141	0.758607
38779	GAAC	66	6878	6944	0.950461
38809	GAAC	133	6869	7002	1.89946
38827	GAAC	50	6669	6719	0.744158
38889	GAAC	47	6974	7021	0.66942
39185	GTTC	61	4991	5052	1.20744
39429	GTTC	22	5657	5679	0.387392
39443	GTTC	55	5429	5484	1.00292
39547	GTTC	1995	4709	6704	29.7584
39897	GTTC	51	4510	4561	1.11818
40113	GAAC	42	4917	4959	0.846945
40144	GAAC	50	4843	4893	1.02187
40525	GAAC	42	5150	5192	0.808937
40666	GAAC	1675	4340	6015	27.847
40671	GAAC	31	4212	4243	0.730615
40746	GAAC	17	4433	4450	0.382022
41010	GTTC	28	4987	5015	0.558325
41058	GTTC	73	5457	5530	1.32007
41164	GAAC	57	5635	5692	1.00141
41224	GAAC	75	5957	6032	1.24337
41452	GAAC	15	4731	4746	0.316056
41523	GAAC	29	4565	4594	0.631258
41587	GAAC	29	4163	4192	0.691794
41706	GAAC	11	5132	5143	0.213883
41807	GAAC	1977	4613	6590	30
41827	GAAC	21	4546	4567	0.45982
42106	GTTC	18	4859	4877	0.369079
42125	GTTC	30	4800	4830	0.621118
42624	GAAC	1190	4831	6021	19.7642
42867	GTTC	48	5214	5262	0.912201
42885	GTTC	10	5208	5218	0.191644
42938	GAAC	1597	4730	6327	25.241
43028	GTTC	50	4719	4769	1.04844
43182	GTTC	21	4177	4198	0.500238
43284	GTTC	38	4929	4967	0.765049
43322	GTTC	50	5009	5059	0.988338
43439	GTTC	50	5749	5799	0.862218
43454	GTTC	57	5863	5920	0.962838
43469	GTTC	40	6138	6178	0.647459
43637	GTTC	43	6244	6287	0.683951
43666	GTTC	43	6283	6326	0.679734
44035	GTTC	103	6784	6887	1.49557
44104	GAAC	115	7008	7123	1.61449
44170	GTTC	119	6978	7097	1.67676
44368	GAAC	57	6033	6090	0.935961
44536	GAAC	38	4494	4532	0.838482
44551	GAAC	49	4152	4201	1.16639
44584	GAAC	42	3323	3365	1.24814
44733	GAAC	17	4945	4962	0.342604
44762	GAAC	2045	4622	6667	30.6735
44773	GAAC	32	4402	4434	0.721696
44833	GAAC	33	4723	4756	0.69386
44914	GAAC	48	3423	3471	1.38289
45175	GAAC	48	4904	4952	0.969305
45544	GTTC	27	5826	5853	0.461302
45649	GTTC	171	5318	5489	3.11532
46165	GTTC	23	4223	4246	0.541686
46190	GTTC	2204	4733	6937	31.7717
46201	GAAC	43	5440	5483	0.784242
46293	GAAC	22	6060	6082	0.361723
46679	GTTC	52	5518	5570	0.933573
47146	GAAC	22	4628	4650	0.473118
47252	GTTC	39	3901	3940	0.989848
47290	GAAC	17	3238	3255	0.522273
47458	GTTC	33	4355	4388	0.752051
47473	GTTC	1711	4418	6129	27.9165
47811	GTTC	36	4714	4750	0.757895
48743	GAAC	16	4928	4944	0.323625
48755	GAAC	27	4943	4970	0.54326
48788	GAAC	1659	4912	6571	25.2473
48830	GTTC	108	4860	4968	2.17391
48981	GTTC	42	3985	4027	1.04296
49016	GAAC	51	4692	4743	1.07527
49049	GAAC	91	5194	5285	1.72185
49124	GTTC	29	5299	5328	0.544294
49332	GTTC	27	5907	5934	0.455005
49400	GTTC	78	6252	6330	1.23223
49527	GTTC	74	6618	6692	1.1058
49853	GTTC	50	7575	7625	0.655738
49886	GAAC	50	7501	7551	0.662164
49986	GTTC	48	6949	6997	0.686008
50044	GTTC	96	6337	6433	1.49231
50054	GTTC	44	6186	6230	0.70626
50157	GAAC	36	5263	5299	0.679373
50181	GAAC	49	4868	4917	0.996543
50255	GTTC	33	3181	3214	1.02676
50276	GAAC	21	2757	2778	0.75594
50451	GAAC	1699	4057	5756	29.517
50766	GAAC	35	4939	4974	0.703659
50925	GTTC	43	5581	5624	0.76458
51083	GAAC	56	5569	5625	0.995556
51117	GTTC	38	5567	5605	0.677966
51254	GTTC	75	5214	5289	1.41804
51276	GAAC	16	5043	5059	0.316268
51393	GAAC	83	4842	4925	1.68528
51727	GTTC	1764	4474	6238	28.2783
51756	GTTC	16	4872	4888	0.327332
51762	GTTC	30	4861	4891	0.613371
51774	GAAC	31	4921	4952	0.62601
52211	GTTC	46	5616	5662	0.812434
52856	GAAC	1839	4247	6086	30.2169
53070	GTTC	27	3366	3393	0.795756
53815	GTTC	67	6814	6881	0.973696
53845	GAAC	124	6602	6726	1.84359
53855	GAAC	58	6421	6479	0.8952
53932	GTTC	106	5871	5977	1.77346
54099	GTTC	37	5145	5182	0.71401
54119	GTTC	56	5008	5064	1.10585
54207	GTTC	86	4669	4755	1.80862
54542	GAAC	1483	3726	5209	28.47
54699	GTTC	32	2589	2621	1.22091
54980	GTTC	84	4970	5054	1.66205
55187	GTTC	231	6265	6496	3.55603
55377	GTTC	86	5950	6036	1.42478
55395	GTTC	101	6238	6339	1.59331
55509	GTTC	167	6145	6312	2.64575
55527	GAAC	94	6196	6290	1.49444
55783	GTTC	78	5280	5358	1.45577
56025	GAAC	34	4655	4689	0.725101
56095	GAAC	12	4427	4439	0.270331
56100	GTTC	36	4362	4398	0.818554
56215	GAAC	58	5213	5271	1.10036
56331	GAAC	27	4483	4510	0.59867
56361	GAAC	1684	4246	5930	28.398
57324	GAAC	46	7101	7147	0.643627
57742	GAAC	63	5297	5360	1.17537
57881	GAAC	38	3524	3562	1.06682
57917	GTTC	41	5595	5636	0.727466
57984	GAAC	26	4949	4975	0.522613
58058	GAAC	2240	5208	7448	30.0752
58104	GAAC	29	5539	5568	0.520833
58170	GTTC	25	6421	6446	0.387837
58270	GAAC	22	4655	4677	0.470387
58522	GAAC	31	5141	5172	0.599381
58535	GAAC	88	5191	5279	1.66698
58569	GTTC	66	5371	5437	1.2139
58761	GTTC	113	6692	6805	1.66054
58874	GAAC	40	7118	7158	0.558815
58916	GTTC	63	6893	6956	0.905693
59011	GTTC	106	6754	6860	1.54519
59511	GTTC	69	3486	3555	1.94093
59692	GTTC	1508	4228	5736	26.2901
60222	GTTC	27	5534	5561	0.485524
60333	GAAC	34	5901	5935	0.572873
60341	GTTC	30	5856	5886	0.509684
60652	GTTC	17	2988	3005	0.565724
60698	GAAC	35	4234	4269	0.819864
60770	GTTC	21	3688	3709	0.56619
60839	GAAC	1314	3475	4789	27.4379
60917	GTTC	23	3592	3615	0.636238
61085	GTTC	36	3664	3700	0.972973
61654	GTTC	26	2565	2591	1.00347
61815	GAAC	1671	3960	5631	29.675
61947	GTTC	19	5355	5374	0.353554
62498	GAAC	1500	3495	4995	30.03
62590	GAAC	16	4257	4273	0.374444
62599	GTTC	43	4343	4386	0.980392
62634	GAAC	28	4738	4766	0.587495
63988	GAAC	1761	4061	5822	30.2473
64900	GTTC	22	4614	4636	0.474547
65029	GTTC	1894	4271	6165	30.7218
65137	GTTC	42	5314	5356	0.784167
65332	GTTC	46	4655	4701	0.978515
65386	GTTC	61	4639	4700	1.29787
65496	GAAC	32	5125	5157	0.620516
65698	GAAC	27	5686	5713	0.472606
65841	GAAC	52	5640	5692	0.913563
66234	GTTC	28	4582	4610	0.607375
66350	GTTC	27	2930	2957	0.913088
66528	GTTC	1851	4363	6214	29.7876
67014	GTTC	38	6118	6156	0.617284
67496	GTTC	54	3102	3156	1.71103
67644	GTTC	65	4340	4405	1.4756
67649	GAAC	1801	4415	6216	28.9736
67690	GTTC	24	4610	4634	0.517911
67708	GTTC	8	4619	4627	0.172898
68004	GTTC	53	4731	4784	1.10786
68230	GAAC	133	5903	6036	2.20345
68315	GTTC	27	6471	6498	0.415512
68323	GAAC	53	6443	6496	0.815887
68401	GTTC	67	6915	6982	0.95961
68508	GAAC	82	7249	7331	1.11854
69193	GTTC	30	3158	3188	0.941029
69383	GTTC	1492	3922	5414	27.5582
69572	GAAC	22	3051	3073	0.715913
70327	GAAC	67	6442	6509	1.02934
70910	GAAC	17	4821	4838	0.351385
70968	GAAC	1968	4920	6888	28.5714
71077	GTTC	23	6021	6044	0.380543
71095	GTTC	37	6262	6299	0.587395
71370	GAAC	46	5352	5398	0.852167
71490	GTTC	46	5771	5817	0.790786
71600	GAAC	77	6756	6833	1.12688
71626	GTTC	44	6772	6816	0.64554
71677	GAAC	55	6543	6598	0.833586
71751	GAAC	44	6034	6078	0.723922
72259	GAAC	1917	4964	6881	27.8593
72570	GAAC	73	4939	5012	1.4565
72799	GTTC	422	5151	5573	7.57222
73715	GAAC	53	5805	5858	0.904746
73752	GTTC	301	5828	6129	4.91108
74090	GAAC	132	5976	6108	2.1611
74294	GAAC	140	6753	6893	2.03105
74379	GAAC	132	6690	6822	1.93492
74405	GAAC	156	6713	6869	2.27107
74436	GTTC	183	6814	6997	2.61541
74723	GAAC	227	5395	5622	4.03771
75013	GTTC	24	5791	5815	0.412726
75043	GAAC	40	5335	5375	0.744186
75118	GAAC	2222	5626	7848	28.3129
75244	GAAC	26	7273	7299	0.356213
75331	GAAC	63	5423	5486	1.14838
75481	GTTC	33	6625	6658	0.495644
75691	GAAC	50	6881	6931	0.721397
75716	GAAC	83	6889	6972	1.19048
75769	GTTC	57	6533	6590	0.864947
75788	GTTC	52	6618	6670	0.77961
75829	GAAC	42	6714	6756	0.62167
76099	GTTC	50	7116	7166	0.697739
76207	GTTC	1378	5973	7351	18.7457
76231	GTTC	87	5634	5721	1.52071
76416	GAAC	28	4646	4674	0.599059
76760	GTTC	15	4901	4916	0.305126
76799	GAAC	2010	4734	6744	29.8043
76900	GAAC	17	5181	5198	0.327049
76949	GAAC	41	3722	3763	1.08956
76967	GAAC	12	3333	3345	0.358744
77141	GTTC	23	5361	5384	0.427192
77156	GTTC	37	5366	5403	0.684805
77183	GAAC	29	5348	5377	0.539334
77282	GTTC	36	5640	5676	0.634249
77510	GAAC	93	6828	6921	1.34374
77668	GTTC	81	6679	6760	1.19822
77807	GAAC	46	6751	6797	0.676769
77972	GAAC	69	7045	7114	0.969918
78004	GAAC	64	6897	6961	0.919408
78115	GAAC	177	7054	7231	2.44779
78158	GAAC	98	6913	7011	1.3978
78217	GAAC	36	6834	6870	0.524017
78400	GTTC	48	7059	7107	0.67539
78460	GTTC	79	7348	7427	1.06369
78642	GTTC	23	6364	6387	0.360106
78687	GTTC	37	6454	6491	0.57002
78776	GTTC	76	6143	6219	1.22206
78941	GAAC	69	5325	5394	1.2792
79145	GTTC	2874	6304	9178	31.314
79227	GTTC	37	6525	6562	0.563852
79468	GAAC	45	5811	5856	0.768443
79517	GAAC	44	5510	5554	0.792222
79775	GTTC	56	6604	6660	0.840841
79874	GTTC	51	6512	6563	0.777084
80157	GAAC	24	5573	5597	0.428801
80424	GAAC	80	5794	5874	1.36193
80539	GAAC	2157	5584	7741	27.8646
81093	GAAC	42	6647	6689	0.627897
81276	GAAC	57	6761	6818	0.836022
81369	GTTC	57	6747	6804	0.837743
81655	GAAC	45	5630	5675	0.792952
81684	GAAC	48	5356	5404	0.888231
82091	GTTC	2262	5356	7618	29.6928
82228	GTTC	25	5460	5485	0.455789
82964	GTTC	39	4954	4993	0.781094
83373	GTTC	1861	4217	6078	30.6186
83868	GTTC	18	3874	3892	0.462487
83935	GTTC	1253	4726	5979	20.9567
84859	GTTC	1854	4561	6415	28.901
85063	GTTC	28	3787	3815	0.733945
85188	GAAC	81	4543	4624	1.75173
85299	GTTC	72	4697	4769	1.50975
85433	GTTC	37	5985	6022	0.614414
85963	GTTC	23	5357	5380	0.427509
85978	GTTC	46	5305	5351	0.859652
86037	GTTC	1451	5537	6988	20.7642
86218	GTTC	34	4520	4554	0.746596
86450	GAAC	53	5054	5107	1.03779
86504	GAAC	65	5291	5356	1.21359
86849	GTTC	1984	5048	7032	28.2139
87019	GTTC	53	3291	3344	1.58493
87082	GAAC	33	4463	4496	0.733986
87097	GAAC	27	4675	4702	0.574224
87274	GTTC	30	5750	5780	0.519031
87482	GTTC	55	6757	6812	0.807399
87503	GTTC	40	6664	6704	0.596659
88011	GAAC	50	5384	5434	0.920132
88130	GAAC	34	4784	4818	0.705687
88185	GTTC	64	3945	4009	1.59641
88352	GTTC	2445	5796	8241	29.6687
88622	GTTC	73	6006	6079	1.20086
88885	GAAC	31	5286	5317	0.583036
88948	GAAC	32	5032	5064	0.631912
89020	GAAC	41	4348	4389	0.934154
89055	GAAC	21	3772	3793	0.553651
89259	GAAC	2066	4882	6948	29.7352
89281	GTTC	45	5254	5299	0.849217
89491	GAAC	39	4787	4826	0.808123
89690	GTTC	29	5581	5610	0.516934
89724	GTTC	47	5842	5889	0.798098
89769	GTTC	66	6077	6143	1.07439
90089	GAAC	111	5812	5923	1.87405
90244	GAAC	54	6112	6166	0.87577
90270	GTTC	823	5916	6739	12.2125
90294	GTTC	34	5821	5855	0.5807
90309	GAAC	31	5818	5849	0.530005
90367	GAAC	56	5786	5842	0.958576
90375	GTTC	54	5764	5818	0.928154
90671	GTTC	59	4055	4114	1.43413
90694	GAAC	38	3678	3716	1.0226
90743	GTTC	33	5931	5964	0.55332
90764	GTTC	27	5590	5617	0.480684
90859	GTTC	1643	4900	6543	25.1108
90868	GAAC	61	4798	4859	1.2554
90873	GTTC	54	4866	4920	1.09756
91516	GAAC	39	5640	5679	0.686741
91609	GAAC	78	5713	5791	1.34692
92277	GTTC	1993	5444	7437	26.7984
92493	GTTC	28	4474	4502	0.621946
92602	GAAC	74	5631	5705	1.29711
92606	GTTC	35	5628	5663	0.618047
92670	GAAC	57	6087	6144	0.927734
92783	GTTC	64	6337	6401	0.999844
92885	GTTC	40	6285	6325	0.632411
93040	GAAC	34	6991	7025	0.483986
93044	GTTC	50	6953	7003	0.71398
93059	GTTC	118	6781	6899	1.71039
93090	GTTC	57	6429	6486	0.878816
93145	GTTC	51	5322	5373	0.94919
93314	GAAC	2186	6802	8988	24.3213
93344	GTTC	38	6470	6508	0.583897
93371	GAAC	34	6439	6473	0.525259
93748	GTTC	67	3943	4010	1.67082
93827	GAAC	22	4895	4917	0.447427
93902	GTTC	1448	5016	6464	22.401
94037	GTTC	30	6568	6598	0.454683
94151	GTTC	39	5909	5948	0.655683
94192	GTTC	86	6529	6615	1.30008
94281	GTTC	67	7127	7194	0.931332
94547	GTTC	153	9511	9664	1.5832
94608	GTTC	57	9666	9723	0.586239
94737	GTTC	48	8660	8708	0.551217
94829	GTTC	132	8431	8563	1.54152
94889	GAAC	55	7932	7987	0.688619
94940	GAAC	59	7399	7458	0.791097
94988	GTTC	39	6704	6743	0.578378
95063	GTTC	61	6286	6347	0.961084
95207	GTTC	33	5350	5383	0.613041
95311	GAAC	35	4050	4085	0.856793
95378	GTTC	26	5649	5675	0.45815
95390	GTTC	25	5657	5682	0.439986
95493	GTTC	34	4740	4774	0.712191
95516	GTTC	2169	4868	7037	30.8228
95754	GTTC	118	4781	4899	2.40865
95768	GTTC	53	5042	5095	1.04024
95774	GTTC	26	5167	5193	0.500674
96105	GAAC	55	6909	6964	0.789776
96221	GTTC	170	6761	6931	2.45275
96246	GTTC	83	6568	6651	1.24793
96608	GTTC	1025	6328	7353	13.9399
96695	GAAC	50	6511	6561	0.762079
96896	GAAC	260	5019	5279	4.92518
96937	GAAC	71	4496	4567	1.55463
97303	GAAC	1262	3907	5169	24.4148
97358	GAAC	28	4020	4048	0.6917
97818	GTTC	42	5447	5489	0.765167
97930	GTTC	37	5893	5930	0.623946
98167	GTTC	27	4949	4976	0.542605
98283	GAAC	26	4390	4416	0.588768
98296	GAAC	79	4290	4369	1.80819
98311	GTTC	24	4116	4140	0.57971
98538	GTTC	1893	4844	6737	28.0986
98809	GAAC	95	5114	5209	1.82377
98977	GTTC	17	4199	4216	0.403226
99452	GAAC	1766	4517	6283	28.1076
99719	GAAC	37	4847	4884	0.757576
99727	GTTC	123	4878	5001	2.45951
99970	GAAC	45	5373	5418	0.830565
100264	GAAC	44	2971	3015	1.45937
100431	GTTC	1859	4263	6122	30.3659
100454	GTTC	48	4335	4383	1.09514
101048	GTTC	52	4915	4967	1.04691
101255	GAAC	22	3851	3873	0.568035
101279	GTTC	34	3537	3571	0.952114
101327	GTTC	19	2724	2743	0.692672
101344	GTTC	42	4429	4471	0.939387
101489	GAAC	1682	3871	5553	30.2899
101519	GTTC	10	4141	4151	0.240906
101590	GTTC	21	4544	4565	0.460022
101628	GTTC	34	4990	5024	0.676752
101638	GTTC	51	3906	3957	1.28886
101709	GTTC	21	3758	3779	0.555703
102069	GAAC	74	3801	3875	1.90968
102269	GTTC	23	4214	4237	0.542837
102287	GTTC	1342	3620	4962	27.0455
102408	GTTC	7	3423	3430	0.204082
102472	GTTC	9	1785	1794	0.501672
102704	GAAC	1264	3881	5145	24.5675
102769	GTTC	14	5109	5123	0.273277
102881	GTTC	22	4022	4044	0.544016
103475	GTTC	15	3677	3692	0.406284
103823	GTTC	23	3825	3848	0.597713
104144	GAAC	1495	4033	5528	27.0441
104610	GTTC	66	5558	5624	1.17354
104985	GTTC	121	6150	6271	1.92952
105064	GAAC	98	6294	6392	1.53317
105179	GTTC	85	5595	5680	1.49648
105245	GAAC	60	5396	5456	1.09971
105265	GTTC	73	5327	5400	1.35185
105321	GTTC	138	5296	5434	2.53957
105326	GTTC	38	5295	5333	0.712545
105360	GTTC	50	5322	5372	0.930752
105386	GTTC	91	5307	5398	1.68581
105614	GAAC	66	5233	5299	1.24552
105677	GAAC	65	5154	5219	1.24545
105817	GTTC	101	4198	4299	2.34938
105889	GTTC	39	3088	3127	1.2472
105927	GAAC	51	5050	5101	0.999804
105938	GTTC	20	4967	4987	0.401043
106056	GAAC	1835	4436	6271	29.2617
106219	GAAC	47	3006	3053	1.53947
106494	GTTC	28	4995	5023	0.557436
106550	GAAC	149	4993	5142	2.89771
106836	GTTC	31	5912	5943	0.521622
107191	GTTC	836	4792	5628	14.8543
107203	GAAC	61	4976	5037	1.21104
107316	GTTC	65	5442	5507	1.18032
107602	GTTC	141	4888	5029	2.80374
107869	GTTC	26	4144	4170	0.623501
107896	GTTC	47	3706	3753	1.25233
108137	GAAC	1406	3545	4951	28.3983
108236	GTTC	12	4005	4017	0.29873
108310	GAAC	34	2805	2839	1.1976
108795	GAAC	43	5434	5477	0.785101
108805	GTTC	40	5484	5524	0.724113
108890	GTTC	29	5862	5891	0.492276
109240	GAAC	43	5970	6013	0.715117
109305	GAAC	64	5751	5815	1.1006
109362	GAAC	80	5610	5690	1.40598
109599	GAAC	186	5571	5757	3.23085
109799	GAAC	68	3855	3923	1.73337
109909	GAAC	52	4914	4966	1.04712
109981	GAAC	1582	4557	6139	25.7697
110066	GTTC	29	4642	4671	0.620852
110413	GAAC	1747	4496	6243	27.9833
110653	GAAC	91	4885	4976	1.82878
110759	GAAC	49	5518	5567	0.880187
110800	GTTC	40	5382	5422	0.737735
110831	GAAC	37	5442	5479	0.675306
111010	GTTC	57	5754	5811	0.980898
111107	GTTC	34	5367	5401	0.629513
111140	GAAC	42	5376	5418	0.775194
111371	GAAC	31	3662	3693	0.839426
111461	GAAC	43	4612	4655	0.923738
111566	GAAC	1395	4164	5559	25.0944
111892	GAAC	22	4255	4277	0.514379
111983	GTTC	52	4276	4328	1.20148
112041	GTTC	18	4207	4225	0.426036
112256	GAAC	24	4427	4451	0.539205
112276	GTTC	1848	5382	7230	25.5602
112307	GTTC	90	6564	6654	1.35257
112744	GAAC	72	6276	6348	1.13422
112915	GAAC	45	6887	6932	0.649163
112936	GTTC	76	6889	6965	1.09117
112992	GAAC	40	6841	6881	0.581311
113731	GTTC	2081	4917	6998	29.7371
114358	GTTC	38	6299	6337	0.599653
115029	GAAC	111	6519	6630	1.67421
115719	GTTC	2035	5030	7065	28.804
115807	GAAC	21	5584	5605	0.374665
115898	GTTC	82	3730	3812	2.1511
116089	GAAC	50	5135	5185	0.96432
116416	GAAC	73	5980	6053	1.20601
116670	GAAC	2235	5547	7782	28.7201
116963	GAAC	30	5493	5523	0.543183
117087	GTTC	42	5286	5328	0.788288
117098	GTTC	41	5324	5365	0.764212
117191	GTTC	60	5848	5908	1.01557
117372	GTTC	29	5923	5952	0.487231
117504	GTTC	47	5379	5426	0.8662
117516	GTTC	51	5317	5368	0.950075
117569	GTTC	23	4971	4994	0.460553
117866	GAAC	16	4628	4644	0.344531
117985	GAAC	1960	4717	6677	29.3545
118062	GTTC	9	6059	6068	0.148319
118231	GTTC	61	5079	5140	1.18677
118490	GAAC	49	4393	4442	1.10311
118532	GTTC	38	4402	4440	0.855856
118565	GAAC	31	4276	4307	0.719759
118839	GAAC	1513	3674	5187	29.1691
119019	GAAC	31	3007	3038	1.02041
119065	GTTC	40	3914	3954	1.01163
119306	GTTC	36	4174	4210	0.855107
119535	GTTC	21	5029	5050	0.415842
119657	GTTC	1812	4736	6548	27.6726
120031	GTTC	67	5266	5333	1.25633
120065	GAAC	45	5181	5226	0.861079
120644	GTTC	47	6748	6795	0.691685
121067	GAAC	88	3945	4033	2.182
121093	GTTC	45	6452	6497	0.692627
121230	GTTC	1728	5256	6984	24.7423
121613	GAAC	138	5408	5546	2.48828
121852	GTTC	74	5902	5976	1.23829
121891	GAAC	43	6015	6058	0.709805
121948	GAAC	584	6081	6665	8.76219
122071	GTTC	51	6113	6164	0.827385
122083	GAAC	45	6181	6226	0.722775
122111	GTTC	99	5392	5491	1.80295
122258	GTTC	65	5526	5591	1.16258
122301	GTTC	97	5695	5792	1.67472
122395	GTTC	59	5913	5972	0.987944
122453	GTTC	50	5168	5218	0.958222
122492	GAAC	82	5011	5093	1.61005
122537	GAAC	36	7088	7124	0.505334
122651	GTTC	1146	5368	6514	17.5929
122698	GTTC	41	4705	4746	0.863885
122773	GTTC	31	4975	5006	0.619257
122798	GTTC	38	4922	4960	0.766129
123173	GAAC	57	5466	5523	1.03205
123186	GTTC	1993	5351	7344	27.1378
123815	GAAC	60	7651	7711	0.778109
124563	GTTC	68	8504	8572	0.79328
124918	GAAC	56	6367	6423	0.871867
124968	GAAC	82	5968	6050	1.35537
125157	GTTC	64	5523	5587	1.14552
125541	GTTC	1884	5711	7595	24.8058
125566	GTTC	33	5156	5189	0.635961
125601	GTTC	48	5114	5162	0.929872
125777	GTTC	48	5019	5067	0.947306
125838	GTTC	60	4549	4609	1.3018
125901	GAAC	72	6206	6278	1.14686
125921	GAAC	96	6160	6256	1.53453
126003	GTTC	42	5950	5992	0.700935
126014	GAAC	1564	6296	7860	19.8982
126837	GAAC	45	7095	7140	0.630252
126998	GTTC	46	5886	5932	0.775455
127046	GTTC	25	5966	5991	0.417293
127058	GTTC	56	6048	6104	0.917431
127278	GTTC	40	6134	6174	0.647878
127345	GAAC	1889	5633	7522	25.113
127365	GAAC	59	5183	5242	1.12552
127459	GTTC	38	5734	5772	0.658351
127465	GTTC	31	5817	5848	0.530096
127494	GTTC	43	4783	4826	0.891007
127574	GTTC	94	4883	4977	1.88869
127713	GAAC	92	6034	6126	1.5018
127824	GTTC	63	6185	6248	1.00832
127969	GAAC	155	6955	7110	2.18003
128341	GTTC	83	7351	7434	1.11649
128353	GTTC	103	7394	7497	1.37388
128503	GTTC	102	6456	6558	1.55535
128888	GAAC	26	3593	3619	0.718431
128935	GTTC	32	5916	5948	0.537996
128958	GAAC	18	5699	5717	0.31485
128987	GTTC	61	5345	5406	1.12838
129055	GTTC	49	5131	5180	0.945946
129065	GAAC	1949	4798	6747	28.8869
129298	GAAC	70	4520	4590	1.52505
129337	GTTC	28	5418	5446	0.514139
129376	GTTC	34	5973	6007	0.566006
129424	GAAC	51	6325	6376	0.799875
129464	GTTC	63	6385	6448	0.977047
129499	GTTC	49	6412	6461	0.758397
129556	GAAC	55	7237	7292	0.754251
129744	GTTC	148	7406	7554	1.95923
129886	GTTC	49	6904	6953	0.704732
130217	GAAC	112	6267	6379	1.75576
130561	GTTC	116	6449	6565	1.76695
130632	GTTC	134	6536	6670	2.009
130828	GTTC	55	5538	5593	0.983372
130877	GTTC	187	5356	5543	3.37362
130903	GTTC	52	5142	5194	1.00116
130943	GAAC	83	5034	5117	1.62204
130986	GAAC	77	4536	4613	1.6692
131071	GTTC	24	5609	5633	0.426061
131097	GTTC	17	5421	5438	0.312615
131192	GTTC	43	4732	4775	0.900524
131213	GAAC	1755	4584	6339	27.6858
131428	GAAC	32	4451	4483	0.713808
131482	GAAC	60	5011	5071	1.1832
131497	GTTC	91	5124	5215	1.74497
131632	GTTC	30	5901	5931	0.505817
131648	GAAC	89	5949	6038	1.474
131659	GTTC	56	6060	6116	0.915631
131821	GTTC	58	7015	7073	0.82002
132015	GTTC	79	6311	6390	1.23631
132340	GAAC	22	4932	4954	0.444086
132396	GTTC	33	4485	4518	0.730412
132462	GTTC	38	4375	4413	0.861092
132477	GTTC	1439	4686	6125	23.4939
132661	GTTC	44	4194	4238	1.03823
132948	GAAC	93	5971	6064	1.53364
133048	GAAC	36	6645	6681	0.538841
133186	GAAC	82	7109	7191	1.14031
133319	GAAC	83	7519	7602	1.09182
133351	GAAC	157	7350	7507	2.09138
133649	GTTC	164	7633	7797	2.10337
134014	GAAC	114	6700	6814	1.67303
134031	GAAC	58	6652	6710	0.864382
134131	GTTC	47	6433	6480	0.725309
134158	GTTC	65	6113	6178	1.05212
134405	GTTC	46	5412	5458	0.8428
134436	GTTC	21	5024	5045	0.416254
134462	GAAC	55	4725	4780	1.15063
134601	GTTC	53	4705	4758	1.11391
134619	GTTC	31	4547	4578	0.677152
134694	GTTC	1567	5067	6634	23.6207
134776	GTTC	27	5584	5611	0.481198
134905	GAAC	48	4679	4727	1.01544
134994	GAAC	166	5646	5812	2.85616
135520	GTTC	73	6410	6483	1.12602
135693	GAAC	58	5199	5257	1.10329
135742	GTTC	33	5072	5105	0.646425
135753	GAAC	37	5064	5101	0.725348
135917	GTTC	44	3179	3223	1.36519
136029	GAAC	15	4168	4183	0.358594
136084	GTTC	1800	4243	6043	29.7865
136110	GAAC	20	4582	4602	0.434594
136191	GAAC	12	5215	5227	0.229577
136218	GAAC	31	5579	5610	0.552585
136451	GTTC	75	5055	5130	1.46199
136554	GAAC	43	5323	5366	0.801342
136762	GTTC	51	3357	3408	1.49648
136852	GAAC	37	4843	4880	0.758197
136928	GAAC	1480	4107	5587	26.4901
136978	GAAC	57	3756	3813	1.49489
137143	GTTC	21	3267	3288	0.638686
137163	GTTC	16	3479	3495	0.457797
137174	GAAC	32	3536	3568	0.896861
137472	GTTC	69	5527	5596	1.23302
137611	GAAC	1664	4751	6415	25.9392
138379	GAAC	46	6120	6166	0.746027
138419	GTTC	113	6242	6355	1.77813
138551	GAAC	74	6565	6639	1.11463
138796	GTTC	85	6338	6423	1.32337
138964	GAAC	26	5382	5408	0.480769
139058	GTTC	61	5354	5415	1.1265
139143	GTTC	54	4658	4712	1.14601
139218	GAAC	22	6060	6082	0.361723
139318	GTTC	9	4874	4883	0.184313
139355	GTTC	1730	4193	5923	29.2082
139378	GAAC	19	3554	3573	0.531766
139393	GAAC	47	3678	3725	1.26174
139421	GAAC	12	3781	3793	0.316372
139532	GTTC	63	2743	2806	2.24519
139732	GTTC	11	3915	3926	0.280183
139737	GAAC	10	3848	3858	0.259202
139780	GTTC	53	3631	3684	1.43865
139814	GTTC	55	3484	3539	1.55411
139821	GTTC	1684	3916	5600	30.0714
139856	GTTC	9	4513	4522	0.199027
139928	GAAC	50	4939	4989	1.0022
139943	GAAC	29	5191	5220	0.555556
140186	GTTC	36	4675	4711	0.764169
140365	GAAC	246	5223	5469	4.49808
140718	GTTC	396	5500	5896	6.71642
140815	GTTC	46	5977	6023	0.763739
141093	GAAC	428	5255	5683	7.53123
141107	GTTC	54	5203	5257	1.0272
141418	GTTC	1753	4739	6492	27.0025
141481	GTTC	18	4462	4480	0.401786
141689	GAAC	25	4637	4662	0.536251
141720	GTTC	45	4841	4886	0.920999
141768	GAAC	39	5072	5111	0.76306
141794	GAAC	76	5223	5299	1.43423
141808	GAAC	44	5291	5335	0.824742
141868	GAAC	58	5838	5896	0.983718
141921	GTTC	44	6325	6369	0.690846
141985	GTTC	48	6535	6583	0.729151
142026	GTTC	27	6473	6500	0.415385
142249	GTTC	54	6287	6341	0.851601
142268	GAAC	57	6377	6434	0.885919
142355	GAAC	73	6522	6595	1.1069
142443	GTTC	98	5501	5599	1.75031
142568	GTTC	34	4745	4779	0.711446
142592	GAAC	88	4488	4576	1.92308
142596	GAAC	155	4336	4491	3.45135
142705	GAAC	62	3245	3307	1.87481
142820	GAAC	56	4360	4416	1.26812
142835	GAAC	47	4367	4414	1.06479
142865	GTTC	1257	4148	5405	23.2562
142932	GTTC	12	4338	4350	0.275862
142999	GAAC	29	4879	4908	0.590872
143096	GAAC	42	4307	4349	0.965739
143586	GAAC	27	6286	6313	0.427689
143664	GAAC	50	6058	6108	0.818599
143679	GTTC	129	6082	6211	2.07696
143705	GAAC	70	6102	6172	1.13415
143940	GAAC	52	5799	5851	0.888737
144047	GAAC	1796	5008	6804	26.3962
144133	GAAC	51	5220	5271	0.967558
144463	GTTC	159	5239	5398	2.94554
144529	GAAC	35	5623	5658	0.618593
144581	GAAC	68	6206	6274	1.08384
144630	GTTC	90	6204	6294	1.42993
144866	GAAC	108	6522	6630	1.62896
144944	GTTC	96	6514	6610	1.45234
145106	GAAC	66	6644	6710	0.983607
145159	GTTC	86	6588	6674	1.28858
145237	GTTC	164	6546	6710	2.44411
145270	GTTC	122	6569	6691	1.82334
145536	GAAC	176	5899	6075	2.89712
145680	GAAC	38	5855	5893	0.644833
145979	GAAC	19	3823	3842	0.494534
146020	GTTC	734	3572	4306	17.046
146099	GAAC	27	4768	4795	0.563087
146129	GTTC	26	4783	4809	0.540653
146188	GAAC	968	3788	4756	20.3532
146213	GTTC	20	3928	3948	0.506586
146288	GAAC	22	4713	4735	0.464625
146333	GAAC	26	4905	4931	0.527276
146405	GAAC	54	4279	4333	1.24625
146670	GAAC	48	5895	5943	0.807673
146825	GTTC	80	6083	6163	1.29807
147254	GAAC	95	5317	5412	1.75536
147317	GAAC	66	4906	4972	1.32743
147540	GAAC	105	4958	5063	2.07387
147711	GAAC	42	5227	5269	0.797115
147743	GTTC	130	4397	4527	2.87166
147927	GAAC	100	5736	5836	1.7135
148001	GTTC	31	5595	5626	0.551013
148058	GAAC	91	5600	5691	1.59902
148445	GTTC	37	6512	6549	0.564972
148532	GAAC	788	7156	7944	9.91944
148540	GAAC	54	6669	6723	0.803213
148555	GTTC	34	6078	6112	0.556283
148725	GAAC	954	4730	5684	16.784
148749	GAAC	24	4705	4729	0.507507
148931	GTTC	47	4885	4932	0.95296
149131	GTTC	75	5380	5455	1.37489
149229	GTTC	24	5429	5453	0.440125
149531	GTTC	13	2928	2941	0.442027
149684	GTTC	8	2876	2884	0.277393
149721	GAAC	27	3736	3763	0.717513
149753	GAAC	23	3779	3802	0.604945
149837	GTTC	41	4597	4638	0.884002
149953	GTTC	22	4930	4952	0.444265
150048	GAAC	16	3949	3965	0.403531
150390	GTTC	926	4797	5723	16.1803
150517	GAAC	42	5913	5955	0.70529
150908	GAAC	144	1073	1217	11.8324
150954	GTTC	44	2621	2665	1.65103
151104	GAAC	50	4487	4537	1.10205
151182	GTTC	39	4150	4189	0.93101
151332	GAAC	712	4461	5173	13.7638
151411	GTTC	24	4428	4452	0.539084
151680	GAAC	890	5253	6143	14.488
151738	GAAC	21	5714	5735	0.366173
151807	GTTC	42	6248	6290	0.667727
151836	GAAC	39	5198	5237	0.744701
151870	GAAC	100	5391	5491	1.82116
152015	GTTC	40	6010	6050	0.661157
152025	GAAC	52	6060	6112	0.850785
152506	GAAC	44	6225	6269	0.701866
152614	GTTC	46	5807	5853	0.785922
152747	GTTC	92	5637	5729	1.60586
152840	GTTC	91	5777	5868	1.55078
152998	GAAC	24	6232	6256	0.383632
153103	GAAC	1976	5246	7222	27.3608
153242	GTTC	80	5972	6052	1.32188
153277	GTTC	154	3794	3948	3.90071
153355	GTTC	25	5106	5131	0.487234
153376	GTTC	71	5352	5423	1.30924
153553	GAAC	52	5696	5748	0.904662
153604	GTTC	61	6010	6071	1.00478
154153	GTTC	115	7112	7227	1.59126
154673	GAAC	57	5939	5996	0.950634
154722	GAAC	60	5347	5407	1.10967
154815	GTTC	67	6841	6908	0.96989
154941	GAAC	60	5726	5786	1.03699
154954	GTTC	2128	5338	7466	28.5025
154963	GTTC	166	5088	5254	3.1595
155250	GTTC	182	5643	5825	3.12446
155529	GAAC	32	6867	6899	0.463835
155537	GAAC	38	6986	7024	0.541002
155645	GTTC	60	7779	7839	0.765404
155651	GAAC	124	7695	7819	1.58588
155745	GTTC	155	7632	7787	1.9905
155831	GAAC	184	8116	8300	2.21687
155837	GAAC	157	8136	8293	1.89316
155988	GTTC	152	8039	8191	1.8557
156017	GAAC	57	7824	7881	0.723258
156083	GAAC	140	7856	7996	1.75088
156381	GTTC	109	7499	7608	1.4327
156416	GAAC	68	7275	7343	0.926052
156471	GAAC	85	7152	7237	1.17452
156566	GTTC	39	6571	6610	0.590015
156588	GTTC	31	6401	6432	0.481965
156618	GAAC	61	6219	6280	0.971338
156653	GAAC	37	6091	6128	0.603786
156803	GTTC	38	4033	4071	0.933432
156933	GAAC	68	5334	5402	1.25879
156972	GTTC	1542	5295	6837	22.5538
156983	GTTC	60	5308	5368	1.11773
157353	GAAC	29	5459	5488	0.528426
157366	GTTC	22	5432	5454	0.403374
157470	GTTC	178	5525	5703	3.12116
157476	GAAC	46	5572	5618	0.818797
157647	GTTC	46	5266	5312	0.865964
157881	GTTC	1546	5254	6800	22.7353
157925	GAAC	37	5390	5427	0.681776
158007	GAAC	235	6104	6339	3.70721
158055	GTTC	45	4256	4301	1.04627
158180	GTTC	33	5948	5981	0.551747
158217	GTTC	133	6236	6369	2.08824
158356	GTTC	176	6460	6636	2.6522
158391	GTTC	42	6585	6627	0.633771
158540	GTTC	157	7050	7207	2.17844
158701	GAAC	64	7591	7655	0.836055
158809	GAAC	84	7456	7540	1.11406
158892	GTTC	100	7183	7283	1.37306
158898	GTTC	136	7192	7328	1.8559
159119	GAAC	43	6589	6632	0.648372
159160	GTTC	42	6453	6495	0.646651
159173	GTTC	35	6356	6391	0.547645
159388	GAAC	33	6110	6143	0.537197
159425	GAAC	184	5985	6169	2.98266
159448	GAAC	71	6278	6349	1.11829
159452	GTTC	1839	5958	7797	23.586
159593	GAAC	59	6651	6710	0.879285
159611	GAAC	103	4678	4781	2.15436
159828	GTTC	35	6394	6429	0.544408
160038	GAAC	165	6188	6353	2.5972
160240	GAAC	82	5195	5277	1.55391
160260	GTTC	158	4879	5037	3.13679
160294	GAAC	34	4318	4352	0.78125
160330	GAAC	33	6070	6103	0.540718
160339	GTTC	70	6037	6107	1.14623
160459	GTTC	1510	5487	6997	21.5807
160623	GAAC	113	4178	4291	2.63342
160719	GTTC	32	5566	5598	0.571633
161023	GAAC	144	7281	7425	1.93939
161126	GAAC	91	7221	7312	1.24453
161140	GTTC	261	7430	7691	3.39358
161539	GTTC	79	8511	8590	0.919674
161548	GTTC	106	8559	8665	1.22331
161656	GTTC	63	8284	8347	0.754762
161922	GAAC	109	7108	7217	1.51032
161991	GAAC	36	6967	7003	0.514065
162212	GAAC	265	6685	6950	3.81295
162220	GAAC	52	6890	6942	0.749064
162247	GTTC	60	6988	7048	0.851305
162362	GAAC	209	6349	6558	3.18695
162392	GTTC	175	6343	6518	2.68487
162426	GTTC	38	6473	6511	0.583628
162651	GAAC	55	6405	6460	0.851393
162727	GAAC	52	5907	5959	0.87263
162960	GAAC	1608	5650	7258	22.1549
163210	GAAC	117	5235	5352	2.1861
163236	GAAC	48	5415	5463	0.878638
163284	GTTC	50	5632	5682	0.879972
163636	GTTC	72	7648	7720	0.932642
163946	GAAC	63	7384	7447	0.845978
164140	GAAC	72	6372	6444	1.11732
164193	GTTC	49	6131	6180	0.79288
164206	GAAC	68	6129	6197	1.09731
164275	GTTC	172	5816	5988	2.87241
164519	GAAC	21	5326	5347	0.392744
164532	GTTC	20	5344	5364	0.372856
164561	GTTC	1870	4948	6818	27.4274
164604	GAAC	13	4745	4758	0.273224
164860	GAAC	42	5395	5437	0.772485
164873	GAAC	79	5398	5477	1.4424
164947	GTTC	53	5445	5498	0.963987
165064	GTTC	121	5646	5767	2.09814
165087	GTTC	35	5734	5769	0.606691
165299	GAAC	156	5480	5636	2.76792
165463	GTTC	51	5930	5981	0.8527
165584	GAAC	1936	5118	7054	27.4454
165845	GTTC	254	5445	5699	4.45692
166183	GTTC	56	6347	6403	0.87459
166497	GTTC	42	6290	6332	0.663298
166562	GTTC	1729	6363	8092	21.3668
166625	GTTC	54	6389	6443	0.838119
167006	GTTC	124	6011	6135	2.02119
167073	GTTC	99	6235	6334	1.56299
167403	GTTC	127	5520	5647	2.24898
167547	GTTC	54	4861	4915	1.09868
167589	GTTC	40	4524	4564	0.876424
167767	GTTC	68	4450	4518	1.50509
167796	GTTC	27	4353	4380	0.616438
167853	GTTC	1516	4747	6263	24.2057
167875	GAAC	26	4902	4928	0.527597
167932	GAAC	79	5173	5252	1.50419
168133	GAAC	197	5224	5421	3.63402
168286	GAAC	146	5529	5675	2.57269
168575	GTTC	53	6333	6386	0.82994
168647	GAAC	58	6039	6097	0.951288
168671	GTTC	54	5728	5782	0.933933
168716	GTTC	73	5166	5239	1.3934
168835	GTTC	39	3692	3731	1.0453
169012	GTTC	1214	4445	5659	21.4526
169111	GTTC	15	4898	4913	0.305312
169141	GTTC	134	5198	5332	2.51313
169540	GAAC	42	5781	5823	0.721278
169608	GAAC	121	6140	6261	1.9326
169922	GAAC	113	6166	6279	1.79965
169965	GAAC	238	6204	6442	3.6945
170028	GAAC	213	6004	6217	3.42609
170222	GTTC	124	5124	5248	2.3628
170367	GTTC	96	4793	4889	1.96359
170577	GTTC	58	5071	5129	1.13082
170712	GTTC	2106	4835	6941	30.3414
170816	GTTC	19	6085	6104	0.311271
170837	GAAC	39	6417	6456	0.604089
170998	GTTC	31	6015	6046	0.512736
171095	GAAC	37	5937	5974	0.619351
171533	GAAC	33	5493	5526	0.597177
171714	GTTC	22	6060	6082	0.361723
171783	GAAC	1870	5905	7775	24.0514
171926	GAAC	59	6181	6240	0.945513
172292	GTTC	56	5735	5791	0.967018
172663	GAAC	88	6186	6274	1.40261
172800	GTTC	144	5662	5806	2.48019
172885	GAAC	25	5197	5222	0.478744
172903	GAAC	30	5066	5096	0.588697
173024	GAAC	42	5574	5616	0.747863
173162	GTTC	2056	5257	7313	28.1143
173201	GAAC	22	5829	5851	0.376004
173277	GTTC	90	6559	6649	1.35359
173312	GTTC	79	4277	4356	1.81359
173387	GTTC	72	5545	5617	1.28182
173452	GAAC	34	6235	6269	0.542351
173529	GAAC	48	5957	6005	0.799334
173581	GAAC	54	6018	6072	0.889328
173594	GAAC	94	6136	6230	1.50883
173613	GTTC	52	6116	6168	0.843061
173871	GAAC	84	7314	7398	1.13544
173951	GTTC	137	7461	7598	1.80311
173974	GAAC	55	7122	7177	0.766337
173978	GAAC	43	7062	7105	0.605208
174266	GTTC	46	5240	5286	0.870223
174317	GAAC	24	4831	4855	0.494336
174378	GTTC	32	3740	3772	0.848356
174549	GTTC	1605	4898	6503	24.6809
174726	GAAC	102	3577	3679	2.77249
174782	GTTC	38	4375	4413	0.861092
174786	GTTC	22	4401	4423	0.4974
174982	GTTC	57	5121	5178	1.10081
175165	GAAC	53	5836	5889	0.899983
175289	GTTC	126	6346	6472	1.94685
175408	GAAC	724	5689	6413	11.2896
175689	GAAC	30	5898	5928	0.506073
175822	GAAC	43	6412	6455	0.66615
175899	GTTC	53	6911	6964	0.761057
176433	GTTC	61	4821	4882	1.24949
176500	GAAC	22	3954	3976	0.55332
176625	GTTC	18	5225	5243	0.343315
176665	GTTC	53	5011	5064	1.0466
176682	GAAC	22	5031	5053	0.435385
176700	GTTC	56	4717	4773	1.17327
176709	GTTC	1786	4866	6652	26.8491
176743	GAAC	21	4762	4783	0.439055
176793	GTTC	8	4978	4986	0.160449
176797	GAAC	33	5024	5057	0.652561
176853	GAAC	83	5453	5536	1.49928
177066	GAAC	73	4774	4847	1.50609
177084	GTTC	44	4763	4807	0.915332
177126	GTTC	80	4399	4479	1.78611
177225	GTTC	54	4864	4918	1.09801
177274	GAAC	79	5035	5114	1.54478
177319	GTTC	30	5227	5257	0.570668
177360	GAAC	68	5066	5134	1.3245
177372	GAAC	59	4837	4896	1.20507
177612	GAAC	1500	4885	6385	23.4926
177702	GAAC	28	5033	5061	0.55325
178233	GAAC	1770	4465	6235	28.3881
178241	GTTC	76	4367	4443	1.71056
178369	GTTC	83	5319	5402	1.53647
178535	GAAC	61	4936	4997	1.22073
178647	GAAC	77	5034	5111	1.50655
179027	GTTC	78	5264	5342	1.46013
179089	GAAC	111	5056	5167	2.14825
179250	GAAC	23	4664	4687	0.490719
179319	GAAC	65	3777	3842	1.69183
179468	GTTC	25	4539	4564	0.547765
179513	GTTC	1609	4418	6027	26.6965
179534	GTTC	24	4498	4522	0.530739
179604	GTTC	40	4702	4742	0.843526
179621	GAAC	50	5005	5055	0.98912
179654	GAAC	30	5122	5152	0.582298
179823	GTTC	36	4828	4864	0.740132
180157	GTTC	32	6149	6181	0.517716
180240	GTTC	86	5901	5987	1.43645
180250	GAAC	101	5714	5815	1.73689
180379	GAAC	23	5098	5121	0.449131
180453	GAAC	46	4063	4109	1.11949
180519	GAAC	32	5050	5082	0.629673
180661	GAAC	1540	3964	5504	27.9797
180848	GAAC	46	3203	3249	1.41582
180886	GAAC	20	3790	3810	0.524934
181595	GAAC	76	6102	6178	1.23017
181842	GTTC	91	6070	6161	1.47703
181949	GAAC	48	5777	5825	0.824034
182162	GAAC	39	4789	4828	0.807788
182360	GAAC	16	5124	5140	0.311284
182367	GTTC	200	5109	5309	3.76719
182393	GAAC	31	5055	5086	0.609516
182411	GAAC	1884	5182	7066	26.6629
182579	GTTC	40	3653	3693	1.08313
182659	GAAC	38	5431	5469	0.694825
182668	GTTC	39	5431	5470	0.71298
182729	GAAC	155	5409	5564	2.78577
182856	GTTC	41	5000	5041	0.813331
183061	GTTC	57	5565	5622	1.01387
183472	GAAC	186	6429	6615	2.81179
183529	GTTC	118	5800	5918	1.99392
183676	GTTC	67	5198	5265	1.27255
183925	GTTC	37	4057	4094	0.903762
183933	GTTC	78	3928	4006	1.94708
184102	GTTC	2143	5368	7511	28.5315
184290	GTTC	40	3957	3997	1.00075
184405	GTTC	48	4858	4906	0.978394
184614	GTTC	41	5450	5491	0.746676
184626	GAAC	51	5488	5539	0.920744
184654	GTTC	31	5132	5163	0.600426
184751	GTTC	44	6920	6964	0.631821
184887	GTTC	2072	4952	7024	29.4989
185141	GAAC	27	4239	4266	0.632911
185336	GTTC	35	5137	5172	0.676721
185671	GTTC	175	7143	7318	2.39136
185836	GAAC	53	6418	6471	0.819039
186276	GAAC	160	5558	5718	2.79818
186522	GAAC	57	4757	4814	1.18405
186538	GAAC	47	4747	4794	0.980392
186831	GAAC	9	3184	3193	0.281867
187021	GTTC	50	4095	4145	1.20627
187026	GAAC	1479	4155	5634	26.2513
187394	GAAC	26	3937	3963	0.656069
187539	GAAC	39	3255	3294	1.18397
187689	GTTC	1782	3996	5778	30.8411
187731	GAAC	13	4524	4537	0.286533
187765	GTTC	31	4719	4750	0.652632
187785	GAAC	26	4907	4933	0.527063
187802	GTTC	43	5117	5160	0.833333
187845	GTTC	26	3141	3167	0.820966
187867	GTTC	22	3299	3321	0.662451
188556	GTTC	51	5504	5555	0.918092
188701	GAAC	1746	4361	6107	28.5901
188715	GAAC	44	4185	4229	1.04044
188722	GTTC	41	4203	4244	0.96607
188854	GAAC	36	3182	3218	1.11871
188882	GAAC	38	3125	3163	1.20139
189162	GAAC	36	3689	3725	0.966443
189184	GAAC	72	3730	3802	1.89374
189497	GAAC	364	4574	4938	7.37141
189511	GAAC	278	4740	5018	5.54006
189738	GAAC	77	4799	4876	1.57916
190043	GAAC	28	4637	4665	0.600214
190175	GTTC	36	4291	4327	0.831985
190352	GTTC	57	4970	5027	1.13388
190425	GAAC	2232	4998	7230	30.8714
190562	GTTC	67	6370	6437	1.04086
190598	GTTC	53	3563	3616	1.46571
190706	GAAC	54	5215	5269	1.02486
190721	GAAC	57	5148	5205	1.0951
190805	GTTC	118	5018	5136	2.29751
191007	GAAC	91	5741	5832	1.56036
191124	GAAC	60	6108	6168	0.972763
191304	GTTC	40	5666	5706	0.701016
191548	GTTC	69	4485	4554	1.51515
191639	GAAC	56	3514	3570	1.56863
191812	GAAC	31	4339	4370	0.709382
191825	GAAC	1806	4554	6360	28.3962
192095	GTTC	39	4580	4619	0.844339
192636	GTTC	42	6167	6209	0.676437
192898	GTTC	33	5836	5869	0.562276
193114	GAAC	32	5894	5926	0.539993
193143	GAAC	53	5733	5786	0.916004
193254	GTTC	1628	5136	6764	24.0686
193283	GAAC	31	5273	5304	0.584465
193304	GTTC	11	5259	5270	0.208729
193329	GTTC	62	5310	5372	1.15413
193822	GTTC	36	5243	5279	0.681947
194184	GTTC	25	5260	5285	0.473037
194213	GAAC	1840	4871	6711	27.4177
194493	GTTC	35	4728	4763	0.734831
194624	GAAC	42	5380	5422	0.774622
194715	GTTC	99	6400	6499	1.52331
195029	GAAC	77	6335	6412	1.20087
195062	GAAC	135	5872	6007	2.24738
195456	GAAC	27	3916	3943	0.684758
195468	GTTC	71	3810	3881	1.82943
195698	GTTC	1605	3874	5479	29.2937
196292	GAAC	101	4667	4768	2.11829
196575	GAAC	1361	4004	5365	25.3681
196807	GAAC	38	3751	3789	1.0029
196828	GTTC	63	3868	3931	1.60265
196962	GTTC	26	4715	4741	0.548408
197055	GAAC	44	3598	3642	1.20813
197144	GAAC	21	5412	5433	0.386527
197235	GAAC	1911	4552	6463	29.5683
197251	GTTC	32	4149	4181	0.765367
197311	GAAC	33	4203	4236	0.779037
197340	GAAC	16	4612	4628	0.345722
197361	GTTC	19	4816	4835	0.392968
197477	GTTC	133	4256	4389	3.0303
198321	GAAC	1923	4857	6780	28.3628
198453	GTTC	65	5775	5840	1.11301
198984	GTTC	59	6137	6196	0.952227
199420	GAAC	1787	4391	6178	28.9252
199507	GAAC	36	4614	4650	0.774194
199977	GAAC	30	5217	5247	0.571755
200092	GTTC	46	5202	5248	0.876524
200217	GAAC	42	5356	5398	0.778066
200228	GTTC	80	5370	5450	1.46789
200300	GTTC	29	4533	4562	0.635686
200315	GTTC	25	4293	4318	0.578972
200436	GTTC	18	5237	5255	0.342531
200519	GTTC	1419	4149	5568	25.4849
200849	GTTC	48	3869	3917	1.22543
200935	GAAC	30	4532	4562	0.657606
200978	GAAC	34	4768	4802	0.708038
201821	GAAC	11	3004	3015	0.364842
201976	GAAC	77	4341	4418	1.74287
202000	GAAC	1913	4529	6442	29.6957
202019	GTTC	39	4977	5016	0.777512
202182	GAAC	23	3374	3397	0.677068
202544	GTTC	70	5142	5212	1.34305
202888	GTTC	42	4987	5029	0.835156
203035	GAAC	41	4434	4475	0.916201
203360	GAAC	43	4160	4203	1.02308
203374	GTTC	2008	4725	6733	29.8233
203498	GTTC	24	6747	6771	0.354453
203587	GAAC	42	4692	4734	0.887199
203633	GAAC	32	5302	5334	0.599925
203638	GAAC	582	5195	5777	10.0744
203839	GTTC	46	5412	5458	0.8428
204109	GAAC	99	6047	6146	1.6108
204469	GTTC	25	4461	4486	0.557289
204486	GTTC	653	4217	4870	13.4086
204679	GAAC	1202	4387	5589	21.5065
204922	GTTC	33	5058	5091	0.648203
205036	GTTC	41	5352	5393	0.760245
205119	GTTC	75	5404	5479	1.36886
205289	GAAC	50	4903	4953	1.00949
205327	GTTC	261	4706	4967	5.25468
205412	GTTC	26	4596	4622	0.562527
205653	GTTC	10	4140	4150	0.240964
205679	GTTC	1357	3644	5001	27.1346
205840	GTTC	25	1909	1934	1.29266
205933	GAAC	25	3749	3774	0.662427
206002	GTTC	16	3568	3584	0.446429
206051	GAAC	58	3351	3409	1.70138
206056	GAAC	950	3448	4398	21.6007
206313	GAAC	33	3846	3879	0.850735
206621	GTTC	11	4071	4082	0.269476
206655	GAAC	2007	5005	7012	28.6224
206903	GTTC	33	5403	5436	0.607064
207005	GAAC	54	4937	4991	1.08195
207069	GAAC	29	4338	4367	0.664071
207298	GTTC	42	3911	3953	1.06248
207461	GAAC	8	4652	4660	0.171674
207496	GAAC	1940	4404	6344	30.5801
207622	GTTC	12	5082	5094	0.235571
207627	GTTC	21	5134	5155	0.407371
207677	GTTC	25	3206	3231	0.773754
207700	GTTC	21	3709	3730	0.563003
207828	GAAC	68	5038	5106	1.33177
207835	GAAC	67	5073	5140	1.3035
208044	GAAC	36	5499	5535	0.650407
208441	GAAC	27	5267	5294	0.510011
208577	GTTC	1548	4204	5752	26.9124
208637	GAAC	32	3855	3887	0.823257
208660	GAAC	61	4033	4094	1.48999
208789	GAAC	34	3441	3475	0.978417
208795	GTTC	28	3529	3557	0.78718
208804	GTTC	17	3702	3719	0.457112
209171	GTTC	90	5105	5195	1.73244
209190	GAAC	39	5243	5282	0.738357
209227	GAAC	43	5164	5207	0.825811
209467	GAAC	102	4216	4318	2.3622
209488	GAAC	34	4190	4224	0.804924
209499	GTTC	40	4252	4292	0.931966
209645	GAAC	29	2957	2986	0.971199
209701	GTTC	32	4705	4737	0.675533
209792	GTTC	29	4229	4258	0.681071
209816	GAAC	2439	5243	7682	31.7495
209872	GAAC	34	6346	6380	0.532915
209975	GAAC	55	3692	3747	1.46784
210205	GTTC	56	5334	5390	1.03896
210352	GAAC	121	5777	5898	2.05154
210443	GAAC	53	5516	5569	0.951697
210485	GAAC	56	5794	5850	0.957265
210499	GAAC	108	5760	5868	1.84049
210604	GAAC	256	5794	6050	4.2314
210673	GTTC	44	6067	6111	0.720013
210749	GTTC	46	6086	6132	0.750163
210787	GAAC	133	5632	5765	2.30703
210986	GTTC	113	6050	6163	1.83352
211049	GAAC	95	5946	6041	1.57259
211327	GAAC	68	5873	5941	1.14459
211415	GAAC	52	6237	6289	0.826841
211627	GAAC	68	5014	5082	1.33806
211642	GTTC	160	4938	5098	3.13849
211863	GAAC	11	4046	4057	0.271136
211960	GTTC	1347	3511	4858	27.7275
211974	GTTC	25	3468	3493	0.715717
212016	GAAC	32	3547	3579	0.894104
212294	GAAC	42	4873	4915	0.854527
212539	GAAC	46	5343	5389	0.853591
212897	GAAC	1413	4362	5775	24.4675
213000	GTTC	34	4852	4886	0.695866
213081	GTTC	44	3709	3753	1.1724
213264	GTTC	42	5162	5204	0.807071
213470	GAAC	71	6019	6090	1.16585
213671	GTTC	60	5575	5635	1.06477
213801	GTTC	30	4550	4580	0.655022
213810	GTTC	31	4391	4422	0.70104
214045	GAAC	1356	3975	5331	25.4361
214080	GAAC	15	3724	3739	0.401177
214148	GTTC	29	4100	4129	0.702349
214230	GTTC	21	3192	3213	0.653595
214240	GTTC	35	3390	3425	1.0219
214368	GAAC	40	4487	4527	0.883587
214501	GAAC	38	5299	5337	0.71201
214575	GAAC	155	5377	5532	2.80188
214695	GAAC	56	5810	5866	0.954654
214780	GAAC	51	5867	5918	0.861778
214786	GAAC	82	5873	5955	1.37699
214906	GAAC	144	5907	6051	2.37977
215265	GAAC	16	3354	3370	0.474777
215303	GAAC	40	3254	3294	1.21433
215441	GAAC	47	3941	3988	1.17854
215505	GTTC	1544	4111	5655	27.3033
215643	GAAC	39	4987	5026	0.775965
215751	GAAC	49	4220	4269	1.14781
215878	GAAC	28	4892	4920	0.569106
215886	GAAC	22	4955	4977	0.442033
216064	GTTC	60	6011	6071	0.988305
216556	GAAC	32	7147	7179	0.445745
216589	GTTC	64	6974	7038	0.909349
216689	GTTC	322	6524	6846	4.70348
216898	GAAC	61	6146	6207	0.982761
216919	GAAC	39	6155	6194	0.629642
217039	GAAC	47	5595	5642	0.833038
217204	GAAC	60	4886	4946	1.2131
217366	GAAC	23	4826	4849	0.474325
217462	GTTC	55	4699	4754	1.15692
217468	GTTC	1953	4802	6755	28.9119
217477	GAAC	31	5008	5039	0.615201
217753	GAAC	34	5142	5176	0.656878
218142	GAAC	74	6425	6499	1.13864
218696	GTTC	34	4886	4920	0.691057
218905	GTTC	54	4546	4600	1.17391
218948	GAAC	42	3675	3717	1.12994
219128	GAAC	1815	4740	6555	27.6888
219169	GTTC	18	4724	4742	0.379587
219287	GAAC	39	3290	3329	1.17152
219297	GTTC	92	3266	3358	2.73973
219305	GAAC	15	3491	3506	0.427838
219344	GTTC	42	4322	4364	0.96242
219354	GAAC	25	4446	4471	0.559159
219422	GTTC	45	5276	5321	0.845706
219464	GAAC	32	5496	5528	0.578871
219606	GTTC	39	5765	5804	0.67195
219676	GAAC	63	6192	6255	1.00719
219828	GAAC	63	5878	5941	1.06043
219994	GAAC	91	5833	5924	1.53612
220007	GAAC	28	5586	5614	0.498753
220186	GTTC	29	6362	6391	0.453763
220221	GTTC	66	6311	6377	1.03497
220238	GTTC	2068	6054	8122	25.4617
220262	GAAC	49	5852	5901	0.830368
220679	GTTC	38	5700	5738	0.662252
220742	GAAC	113	5955	6068	1.86223
220871	GAAC	50	6256	6306	0.792896
220958	GAAC	174	5818	5992	2.90387
221102	GAAC	30	5298	5328	0.563063
221486	GTTC	1832	5953	7785	23.5324
221681	GAAC	68	5338	5406	1.25786
221872	GAAC	97	6509	6606	1.46836
222153	GAAC	183	7000	7183	2.54768
222269	GAAC	37	6194	6231	0.593805
222416	GAAC	31	4975	5006	0.619257
222461	GTTC	41	4783	4824	0.849917
222470	GTTC	67	5699	5766	1.16198
222617	GAAC	803	5140	5943	13.5117
222787	GTTC	72	4994	5066	1.42124
222886	GAAC	242	5449	5691	4.25233
223012	GAAC	78	5394	5472	1.42544
223204	GAAC	116	5614	5730	2.02443
223230	GTTC	96	5680	5776	1.66205
223481	GAAC	75	5372	5447	1.3769
223611	GAAC	134	4808	4942	2.71145
223619	GTTC	32	4846	4878	0.656007
223666	GTTC	39	4616	4655	0.837809
223741	GTTC	30	4008	4038	0.742942
223958	GTTC	1562	4100	5662	27.5874
224444	GAAC	48	5173	5221	0.919364
224453	GAAC	1300	5622	6922	18.7807
224620	GAAC	66	4790	4856	1.35914
224653	GTTC	39	5290	5329	0.731845
225008	GAAC	62	5994	6056	1.02378
225223	GTTC	129	6958	7087	1.82023
225524	GAAC	45	6157	6202	0.725572
225866	GTTC	59	5734	5793	1.01847
226009	GAAC	1852	5039	6891	26.8756
226173	GTTC	48	3256	3304	1.45278
226356	GAAC	54	5585	5639	0.957617
226439	GTTC	34	5710	5744	0.591922
226688	GAAC	62	5974	6036	1.02717
226787	GAAC	38	4569	4607	0.824832
226928	GTTC	14	5629	5643	0.248095
226971	GTTC	23	5473	5496	0.418486
226991	GAAC	1486	4768	6254	23.7608
227033	GAAC	20	4307	4327	0.462214
227128	GAAC	21	4859	4880	0.430328
227143	GTTC	48	3440	3488	1.37615
227443	GTTC	38	4919	4957	0.766593
227925	GAAC	26	4458	4484	0.579839
227961	GAAC	1552	4421	5973	25.9836
228009	GTTC	17	4588	4605	0.369164
228106	GAAC	39	5060	5099	0.764856
228379	GTTC	1111	4891	6002	18.5105
228852	GAAC	111	6493	6604	1.6808
228865	GAAC	348	6431	6779	5.1335
228952	GTTC	72	6166	6238	1.15422
228971	GAAC	63	6159	6222	1.01254
229221	GAAC	151	5643	5794	2.60614
229569	GTTC	77	5878	5955	1.29303
229609	GTTC	37	5905	5942	0.622686
229707	GAAC	38	5621	5659	0.671497
229727	GAAC	92	5477	5569	1.652
229928	GTTC	39	4577	4616	0.844887
230283	GAAC	52	3893	3945	1.31812
230293	GTTC	1248	3700	4948	25.2223
230453	GAAC	22	2310	2332	0.943396
230508	GTTC	13	3288	3301	0.39382
230638	GAAC	104	5171	5275	1.97156
230722	GTTC	33	5450	5483	0.60186
230774	GTTC	85	5669	5754	1.47723
231137	GAAC	56	5649	5705	0.981595
231257	GAAC	29	4895	4924	0.588952
231268	GAAC	54	4853	4907	1.10047
231277	GAAC	1845	4957	6802	27.1244
231623	GAAC	50	5280	5330	0.938086
231866	GTTC	102	6219	6321	1.61367
232081	GAAC	60	6106	6166	0.973078
232099	GAAC	57	6059	6116	0.931982
232256	GAAC	118	6516	6634	1.77872
232261	GAAC	41	6495	6536	0.627295
232279	GAAC	117	6379	6496	1.80111
232605	GTTC	75	6116	6191	1.21144
232624	GAAC	32	6050	6082	0.526143
232668	GAAC	68	5465	5533	1.22899
232675	GAAC	41	5531	5572	0.735822
232780	GAAC	32	5226	5258	0.608596
232849	GTTC	31	5165	5196	0.596613
232864	GTTC	45	5107	5152	0.873447
232974	GTTC	44	3520	3564	1.23457
233042	GTTC	25	5057	5082	0.491932
233062	GTTC	18	4810	4828	0.372825
233152	GAAC	1940	4708	6648	29.1817
233264	GTTC	17	5617	5634	0.301739
233675	GAAC	63	5184	5247	1.20069
233723	GTTC	30	5037	5067	0.592066
233778	GAAC	52	5255	5307	0.979838
233915	GTTC	28	4891	4919	0.569221
234045	GAAC	651	4230	4881	13.3374
234129	GTTC	20	5073	5093	0.392696
234193	GTTC	261	4922	5183	5.03569
234241	GAAC	27	3717	3744	0.721154
234460	GTTC	51	4324	4375	1.16571
234469	GAAC	730	4376	5106	14.2969
234508	GTTC	95	4254	4349	2.18441
234792	GTTC	1990	6010	8000	24.875
234832	GTTC	10	6411	6421	0.155739
234951	GTTC	41	4108	4149	0.98819
235307	GTTC	56	6054	6110	0.91653
235572	GTTC	159	7030	7189	2.21171
235722	GAAC	70	6575	6645	1.05342
235904	GTTC	54	5593	5647	0.95626
235912	GTTC	53	5538	5591	0.947952
235921	GAAC	46	5416	5462	0.842182
236017	GTTC	73	4710	4783	1.52624
236167	GAAC	41	3609	3650	1.12329
236176	GTTC	21	3491	3512	0.59795
236305	GAAC	21	4248	4269	0.491918
236371	GAAC	1320	4319	5639	23.4084
236423	GTTC	23	4373	4396	0.523203
236440	GAAC	17	4418	4435	0.383315
236490	GAAC	37	4906	4943	0.748533
236527	GTTC	20	3207	3227	0.619771
236739	GAAC	38	3987	4025	0.944099
236829	GTTC	37	4599	4636	0.798102
236963	GAAC	1303	4367	5670	22.9806
236979	GAAC	29	4724	4753	0.610141
237171	GAAC	95	4323	4418	2.15029
237198	GAAC	58	4816	4874	1.18999
237211	GAAC	88	5021	5109	1.72245
237449	GTTC	93	6867	6960	1.33621
237551	GTTC	62	7686	7748	0.800207
238200	GTTC	27	4332	4359	0.619408
238232	GAAC	56	3717	3773	1.48423
238261	GAAC	57	3362	3419	1.66715
238417	GTTC	1868	4760	6628	28.1835
238498	GTTC	12	5017	5029	0.238616
238632	GAAC	12	4306	4318	0.277906
238747	GAAC	41	4082	4123	0.994422
239100	GAAC	1194	3523	4717	25.3127
239386	GAAC	39	3787	3826	1.01934
239731	GAAC	228	5363	5591	4.07798
240447	GTTC	26	4858	4884	0.532351
240571	GAAC	1933	4535	6468	29.8856
240666	GAAC	20	5650	5670	0.352734
240754	GAAC	43	3701	3744	1.1485
240807	GTTC	30	4619	4649	0.6453
241070	GTTC	41	4327	4368	0.938645
241373	GTTC	22	5399	5421	0.405829
241438	GAAC	14	4671	4685	0.298826
241489	GAAC	1975	4703	6678	29.5747
241512	GTTC	52	4885	4937	1.05327
241583	GAAC	38	5288	5326	0.713481
241638	GTTC	209	4514	4723	4.42515
241713	GTTC	34	4264	4298	0.791066
241745	GAAC	70	4634	4704	1.4881
241793	GAAC	132	4775	4907	2.69003
241962	GTTC	35	4543	4578	0.764526
242004	GAAC	49	4759	4808	1.01913
242057	GAAC	81	5195	5276	1.53525
242075	GAAC	34	5328	5362	0.634092
242096	GAAC	71	5393	5464	1.29941
242157	GTTC	30	5490	5520	0.543478
242176	GTTC	36	5431	5467	0.658496
242598	GAAC	63	5661	5724	1.10063
242723	GAAC	110	5515	5625	1.95556
242783	GTTC	102	5236	5338	1.91083
242841	GTTC	112	5140	5252	2.13252
243465	GAAC	1656	4634	6290	26.3275
243564	GAAC	8	5408	5416	0.14771
243737	GAAC	45	5139	5184	0.868056
244037	GAAC	24	5268	5292	0.453515
244056	GAAC	41	5258	5299	0.773731
244081	GAAC	34	5406	5440	0.625
244121	GTTC	67	5278	5345	1.25351
244256	GTTC	35	3893	3928	0.891039
244302	GTTC	40	5881	5921	0.675562
244317	GAAC	29	5714	5743	0.504963
244428	GTTC	1774	5224	6998	25.3501
244585	GAAC	42	3886	3928	1.06925
245040	GTTC	55	4976	5031	1.09322
245227	GAAC	25	4194	4219	0.592557
245391	GTTC	7	4298	4305	0.162602
245445	GTTC	16	4109	4125	0.387879
245469	GAAC	1546	3974	5520	28.0072
245665	GTTC	17	3160	3177	0.535096
245739	GAAC	27	4204	4231	0.638147
246559	GTTC	45	6248	6293	0.71508
246890	GTTC	104	6883	6987	1.48848
246933	GAAC	88	6653	6741	1.30544
246947	GTTC	195	6589	6784	2.87441
247337	GTTC	26	5487	5513	0.471613
247575	GAAC	2049	5284	7333	27.9422
247588	GTTC	60	5325	5385	1.11421
247620	GAAC	54	5138	5192	1.04006
247658	GTTC	30	5320	5350	0.560748
247859	GAAC	130	5449	5579	2.33017
247893	GTTC	57	5675	5732	0.994417
248054	GAAC	40	6086	6126	0.652955
248099	GAAC	87	6373	6460	1.34675
248130	GAAC	68	6323	6391	1.064
248206	GAAC	143	6294	6437	2.22153
248268	GTTC	74	6367	6441	1.14889
248288	GTTC	76	6521	6597	1.15204
248526	GTTC	44	6285	6329	0.695213
248930	GAAC	211	6597	6808	3.09929
248973	GAAC	47	6874	6921	0.679093
249197	GAAC	68	6563	6631	1.02549
249304	GTTC	75	6478	6553	1.14451
249346	GAAC	120	6149	6269	1.91418
249505	GAAC	97	5603	5700	1.70175
249791	GAAC	42	4923	4965	0.845921
250057	GAAC	1405	4770	6175	22.753
250082	GTTC	13	5071	5084	0.255704
250169	GTTC	40	4856	4896	0.816993
250348	GAAC	1113	4336	5449	20.4258
250436	GAAC	23	3623	3646	0.630828
250522	GTTC	14	2670	2684	0.52161
250536	GTTC	17	2722	2739	0.620664
250656	GAAC	35	3926	3961	0.883615
250715	GAAC	38	3791	3829	0.992426
250721	GAAC	22	3785	3807	0.577883
250742	GTTC	17	3714	3731	0.455642
250772	GAAC	1146	3903	5049	22.6976
250795	GTTC	22	4121	4143	0.531016
251409	GTTC	23	2769	2792	0.823782
251438	GAAC	25	2238	2263	1.10473
251494	GAAC	17	3878	3895	0.436457
251606	GAAC	1649	3589	5238	31.4815
251629	GTTC	32	4040	4072	0.785855
251974	GTTC	22	4234	4256	0.516917
252043	GTTC	89	4280	4369	2.03708
252075	GAAC	37	4314	4351	0.850379
252560	GAAC	1920	4552	6472	29.6663
252747	GTTC	22	3593	3615	0.608575
253140	GAAC	24	4532	4556	0.526778
253202	GTTC	23	3679	3702	0.621286
253326	GTTC	24	5094	5118	0.468933
253383	GAAC	1987	5430	7417	26.7898
253435	GAAC	37	6027	6064	0.610158
253651	GAAC	61	5900	5961	1.02332
253864	GAAC	49	6438	6487	0.755357
254131	GAAC	67	6542	6609	1.01377
254915	GTTC	1787	4793	6580	27.1581
254932	GAAC	27	5213	5240	0.515267
255009	GAAC	26	5515	5541	0.469229
255192	GTTC	41	5034	5075	0.807882
255964	GAAC	46	5454	5500	0.836364
256096	GTTC	25	5111	5136	0.48676
256287	GAAC	29	4203	4232	0.685255
256331	GTTC	39	4345	4384	0.889599
256423	GAAC	29	3571	3600	0.805556
256433	GTTC	27	3492	3519	0.767263
256455	GTTC	13	3118	3131	0.415203
256636	GAAC	1634	4198	5832	28.0178
256711	GTTC	18	4497	4515	0.398671
256733	GTTC	20	4792	4812	0.415628
256756	GTTC	14	5129	5143	0.272215
257251	GAAC	91	6511	6602	1.37837
257287	GTTC	47	6706	6753	0.695987
257318	GAAC	87	6773	6860	1.26822
257427	GAAC	82	6910	6992	1.17277
257463	GAAC	66	6985	7051	0.936037
257848	GAAC	68	4909	4977	1.36628
258172	GTTC	1713	4488	6201	27.6246
258257	GTTC	9	4937	4946	0.181965
258509	GAAC	40	4702	4742	0.843526
258582	GTTC	66	4811	4877	1.35329
258833	GTTC	44	5374	5418	0.812108
258870	GTTC	38	4990	5028	0.755768
259016	GAAC	30	4385	4415	0.679502
259069	GAAC	26	4336	4362	0.596057
259233	GTTC	31	3078	3109	0.997105
259244	GTTC	30	3086	3116	0.962773
259404	GAAC	1588	4225	5813	27.3181
259560	GTTC	113	3264	3377	3.34617
259802	GAAC	62	5230	5292	1.17158
259863	GAAC	48	5674	5722	0.838868
260111	GTTC	163	5773	5936	2.74596
260217	GTTC	26	5798	5824	0.446429
260364	GTTC	40	4895	4935	0.810537
260455	GAAC	62	4767	4829	1.28391
260515	GAAC	29	4758	4787	0.605807
260531	GTTC	80	4776	4856	1.64745
260557	GTTC	27	4641	4668	0.578406
260584	GTTC	34	4497	4531	0.750386
260833	GTTC	1465	4741	6206	23.6062
260891	GTTC	61	4892	4953	1.23158
260908	GTTC	25	4988	5013	0.498703
261058	GAAC	46	4457	4503	1.02154
261143	GTTC	61	5187	5248	1.16235
261315	GAAC	38	5329	5367	0.708031
261416	GAAC	31	5359	5390	0.575139
261434	GTTC	35	5351	5386	0.649833
261622	GAAC	42	5400	5442	0.771775
261692	GAAC	252	5740	5992	4.20561
262361	GTTC	71	6100	6171	1.15054
262522	GTTC	85	5775	5860	1.45051
262661	GTTC	53	5890	5943	0.891805
262877	GAAC	55	4877	4932	1.11517
262918	GTTC	30	4798	4828	0.621375
263265	GAAC	1977	4475	6452	30.6417
263561	GTTC	32	4201	4233	0.755965
263774	GAAC	44	6186	6230	0.70626
263993	GAAC	42	6258	6300	0.666667
264047	GTTC	34	5808	5842	0.581992
264249	GTTC	83	4844	4927	1.6846
264385	GAAC	52	3460	3512	1.48064
264509	GTTC	20	3874	3894	0.513611
264535	GAAC	1782	4241	6023	29.5866
264760	GTTC	64	4420	4484	1.4273
265202	GTTC	117	6279	6396	1.82927
265254	GTTC	100	6400	6500	1.53846
265491	GAAC	61	5586	5647	1.08022
265497	GTTC	131	5533	5664	2.31285
265585	GAAC	44	5316	5360	0.820896
265590	GTTC	82	5369	5451	1.50431
265728	GTTC	28	3971	3999	0.700175
265763	GTTC	46	3774	3820	1.20419
265826	GAAC	39	5329	5368	0.726528
265918	GAAC	1769	5230	6999	25.275
266332	GAAC	35	4216	4251	0.823336
266489	GTTC	12	4414	4426	0.271125
266499	GTTC	20	4408	4428	0.451671
266567	GAAC	1706	4804	6510	26.2058
266774	GAAC	47	4506	4553	1.03229
266952	GAAC	34	5719	5753	0.590996
267124	GTTC	21	5649	5670	0.37037
267607	GTTC	36	5247	5283	0.681431
267710	GTTC	37	4908	4945	0.748231
268040	GAAC	1608	4588	6196	25.9522
268052	GTTC	42	4744	4786	0.87756
268159	GAAC	26	5429	5455	0.476627
268240	GTTC	20	3549	3569	0.560381
268295	GAAC	32	4252	4284	0.746965
268319	GAAC	50	4422	4472	1.11807
268434	GAAC	52	4674	4726	1.1003
268523	GAAC	28	4958	4986	0.561572
268592	GAAC	58	4184	4242	1.36728
268706	GTTC	65	5308	5373	1.20975
268778	GAAC	1099	4980	6079	18.0786
268829	GAAC	49	4778	4827	1.01512
269365	GAAC	28	5355	5383	0.520156
269448	GAAC	46	5264	5310	0.86629
269599	GAAC	114	4621	4735	2.4076
269737	GTTC	27	4060	4087	0.660631
269860	GTTC	55	4842	4897	1.12314
269951	GTTC	1482	4422	5904	25.1016
269961	GAAC	81	4458	4539	1.78453
270202	GAAC	25	4454	4479	0.55816
270265	GAAC	37	4546	4583	0.807331
270286	GTTC	90	4702	4792	1.87813
270346	GAAC	33	4749	4782	0.690088
270464	GTTC	32	5238	5270	0.607211
270541	GAAC	90	5428	5518	1.63103
270659	GTTC	26	5233	5259	0.494391
270727	GAAC	53	4977	5030	1.05368
270840	GTTC	33	4929	4962	0.665054
270967	GAAC	528	4241	4769	11.0715
271101	GAAC	40	4244	4284	0.933707
271130	GTTC	31	3477	3508	0.883694
271194	GTTC	22	2905	2927	0.751623
271222	GTTC	29	4787	4816	0.602159
271258	GTTC	24	4472	4496	0.533808
271355	GTTC	1518	4293	5811	26.1229
271425	GTTC	20	4639	4659	0.429277
271970	GTTC	112	5749	5861	1.91094
271986	GAAC	55	5710	5765	0.954033
272103	GTTC	77	6197	6274	1.22729
272109	GAAC	85	6191	6276	1.35437
272448	GAAC	65	5082	5147	1.26287
272518	GTTC	115	4768	4883	2.35511
272684	GTTC	11	4647	4658	0.236153
272777	GAAC	1568	3870	5438	28.8341
272873	GAAC	14	3763	3777	0.370665
273187	GAAC	26	5176	5202	0.499808
273214	GTTC	42	5168	5210	0.806142
273281	GTTC	31	5398	5429	0.571008
273846	GTTC	34	5221	5255	0.647003
274154	GTTC	16	4320	4336	0.369004
274244	GTTC	1320	4350	5670	23.2804
274277	GAAC	13	4814	4827	0.269318
274515	GAAC	41	4583	4624	0.886678
274620	GAAC	40	4739	4779	0.836995
275061	GAAC	27	4314	4341	0.621977
275086	GAAC	34	4196	4230	0.803783
275133	GAAC	66	3678	3744	1.76282
275309	GAAC	1073	4371	5444	19.7098
275342	GAAC	51	4544	4595	1.1099
275396	GTTC	31	4728	4759	0.651397
275831	GAAC	42	2714	2756	1.52395
275863	GTTC	21	5096	5117	0.410397
275994	GAAC	1424	4246	5670	25.1146
276052	GAAC	19	4043	4062	0.46775
276073	GTTC	8	4228	4236	0.188857
277090	GAAC	36	5816	5852	0.615174
277243	GAAC	43	5371	5414	0.794237
277272	GAAC	29	4865	4894	0.592562
277491	GTTC	1379	5281	6660	20.7057
277572	GAAC	26	5680	5706	0.455661
277591	GTTC	19	5885	5904	0.321816
277616	GAAC	111	6110	6221	1.78428
277791	GTTC	37	5764	5801	0.637821
277837	GTTC	61	5857	5918	1.03075
277852	GAAC	61	5781	5842	1.04416
278070	GTTC	36	5019	5055	0.712166
278387	GAAC	1681	4264	5945	28.2759
278525	GAAC	47	4757	4804	0.978351
278564	GAAC	10	3089	3099	0.322685
278645	GAAC	59	4153	4212	1.40076
278681	GTTC	68	4302	4370	1.55606
278827	GTTC	74	4387	4461	1.65882
278869	GTTC	51	4542	4593	1.11039
278946	GAAC	74	4664	4738	1.56184
278992	GTTC	28	4756	4784	0.585284
279250	GTTC	76	5111	5187	1.4652
279383	GTTC	394	5492	5886	6.69385
279394	GTTC	135	5563	5698	2.36925
279491	GTTC	139	5365	5504	2.52544
279531	GAAC	275	5186	5461	5.03571
279786	GTTC	36	4681	4717	0.763197
279847	GTTC	38	4920	4958	0.766438
279882	GAAC	89	5004	5093	1.7475
280084	GTTC	50	5217	5267	0.949307
280184	GTTC	57	5259	5316	1.07223
[truncated: 30,796 more rows]

## Sheet:  10 control sites ratio
10 control sites ratio throughout the Salmonella enterica serovar Cerro 87 genome
Position	Motifs	Ended reads	Random reads	Total reads	PT ratio(%)
2185	AATC	9	1030	1039	0.866218
5988	AAGA	17	2106	2123	0.565238
8200	TTTT	21	2353	2374	0.884583
12903	ACGG	30	2902	2932	1.02319
16412	CGAC	23	2474	2497	0.921105
20717	CCGG	21	2321	2342	0.89667
22316	AACT	28	2224	2252	1.37655
28628	TCCT	21	2012	2033	1.03296
37058	GTCT	7	2120	2127	0.329102
42948	GTCC	29	4787	4816	0.602159
Average PT ratio of 10 control sites					0.849778
